# Supplementary material for: Aberrant homeodomain–DNA cooperative dimerization underlies distinct developmental defects in two dominant CRX retinopathy models
Source: HighWire-hosted journal article supplement (doi:10.1101/gr.279340.124), 2024-12-23
Supplement: Supplemental_Tables.xlsx [file Supplemental_Tables.xlsx]

## Sheet: Supplemental Table S1
Supplemental Table S1. Plasmids and primers for Biochemistry Experiments
Experiment	Oligo name	Usage	Usage amount	Sequence	Comments
Luciferase reporter assay	pcDNA3.1-mCrx-WT	protein expression in HEK293T cells	800ng/6 well		Chen et al., 2002
	pcDNA3.1-mCrx-K88N	protein expression in HEK293T cells	800ng/6 well		Zheng et al., 2023
	pGL2-3×BAT-1 WT-luc	luciferase reporter	2ug/6 well		Chen et al., 2002
	pGL2-3×BAT-1 P5 GA-luc	luciferase reporter	2ug/6 well		Generated in this study
	pGL2-3×BAT-1-mA-luc	luciferase reporter	2ug/6 well		Generated in this study
	pGL2-3×BAT-1-mB-luc	luciferase reporter	2ug/6 well		Generated in this study
	pGL2-3×BAT-1-mAB-luc	luciferase reporter	2ug/6 well		Generated in this study
	pRL-CMV	renilla lucierase reporter control	2ng/6 well		Chen et al., 2002
	BAT1 P5 GA-F1	cloning oligo for BAT-1 P5 luciferase reporter		TCGAGCGTTATTAATCAgaTATTAATCCTC	Generated in this study
	BAT1 P5 GA-R1	cloning oligo for BAT-1 P5 luciferase reporter		CAGTGAGGATTAATAtcTGATTAATAACGC	Generated in this study
	BAT1 P5 GA-F2	cloning oligo for BAT-1 P5 luciferase reporter		ACTGGGCGTTATTAATCAgaTATTAATCCTCACTGGGC	Generated in this study
	BAT1 P5 GA-R2	cloning oligo for BAT-1 P5 luciferase reporter		TAACGCCCAGTGAGGATTAATAtcTGATTAATAACGCC	Generated in this study
	BAT1 P5 GA-F3	cloning oligo for BAT-1 P5 luciferase reporter		GTTATTAATCAgaTATTAATCCTCACTGAATTTCGAG	Generated in this study
	BAT1 P5 GA-R3	cloning oligo for BAT-1 P5 luciferase reporter		CTAGCTCGAAATTCAGTGAGGATTAATAtcTGATTAA	Generated in this study
	BAT1 mA-F1	cloning oligo for BAT-1 mA luciferase reporter		TCGAGCGTTATactaCATATTAATCCTC	Generated in this study
	BAT1 mA-R1	cloning oligo for BAT-1 mA luciferase reporter		CAGTGAGGATTAATATGtagtATAACGC	Generated in this study
	BAT1 mA-F2	cloning oligo for BAT-1 mA luciferase reporter		ACTGGGCGTTATactaCATATTAATCCTCACTGGGC	Generated in this study
	BAT1 mA-R2	cloning oligo for BAT-1 mA luciferase reporter		TAACGCCCAGTGAGGATTAATATGtagtATAACGCC	Generated in this study
	BAT1 mA-F3	cloning oligo for BAT-1 mA luciferase reporter		GTTATactaCATATTAATCCTCACTGAATTTCGAG	Generated in this study
	BAT1 mA-R3	cloning oligo for BAT-1 mA luciferase reporter		CTAGCTCGAAATTCAGTGAGGATTAATATGtagtA	Generated in this study
	BAT1 mB-F1	cloning oligo for BAT-1 mB luciferase reporter		TCGAGCGTTATTAATCATATactaCCTC	Generated in this study
	BAT1 mB-R1	cloning oligo for BAT-1 mB luciferase reporter		CAGTGAGGtagtATATGATTAATAACGC	Generated in this study
	BAT1 mB-F2	cloning oligo for BAT-1 mB luciferase reporter		ACTGGGCGTTATTAATCATATactaCCTCACTGGGC	Generated in this study
	BAT1 mB-R2	cloning oligo for BAT-1 mB luciferase reporter		TAACGCCCAGTGAGGtagtATATGATTAATAACGCC	Generated in this study
	BAT1 mB-F3	cloning oligo for BAT-1 mB luciferase reporter		GTTATTAATCATATactaCCTCACTGAATTTCGAG	Generated in this study
	BAT1 mB-R3	cloning oligo for BAT-1 mB luciferase reporter		CTAGCTCGAAATTCAGTGAGGtagtATATGATTAA	Generated in this study
	BAT1 mAB-F1	cloning oligo for BAT-1 mAB luciferase reporter		TCGAGCGTTATactaCATATactaCCTC	Generated in this study
	BAT1 mAB-R1	cloning oligo for BAT-1 mAB luciferase reporter		CAGTGAGGtagtATATGtagtATAACGC	Generated in this study
	BAT1 mAB-F2	cloning oligo for BAT-1 mAB luciferase reporter		ACTGGGCGTTATactaCATATactaCCTCACTGGGC	Generated in this study
	BAT1 mAB-R2	cloning oligo for BAT-1 mAB luciferase reporter		TAACGCCCAGTGAGGtagtATATGtagtATAACGCC	Generated in this study
	BAT1 mAB-F3	cloning oligo for BAT-1 mAB luciferase reporter		GTTATactaCATATactaCCTCACTGAATTTCGAG	Generated in this study
	BAT1 mAB-R3	cloning oligo for BAT-1 mAB luciferase reporter		CTAGCTCGAAATTCAGTGAGGtagtATATGtagtA	Generated in this study
Protein purification	pGEX4T2-CRXHD-WT	protein expression in E.coli BL21 (DE3)			Chen et al., 2002
	pGEX4T2-CRXHD-E80A	protein expression in E.coli BL21 (DE3)			Chen et al., 2002
	pGEX4T2-CRXHD-K88N	protein expression in E.coli BL21 (DE3)			Zheng et al., 2023
	pGEX4T2-CRXHD-R90W	protein expression in E.coli BL21 (DE3)			Chen et al., 2002
BAT-1 EMSA	BAT-1 (WT) F	BAT-1 probe forward oligo	30ng/lane	CGTTATTAATCATATTAATCCTCACTGCTGC	Generated in this study
	5'-IRDye700-BAT-1 (WT) R	BAT-1 probe reverse oligo		5' IRDye® 700 - GCAGCAGTGAGGATTAATATGATTAATAACG	Generated in this study
	BAT-1 P5 GA F	BAT-1 P5 GA probe forward oligo	30ng/lane	CGTTATTAATCAGATATTAATCCTCACTGCTGC	Generated in this study
	5'-IRDye700-BAT-1 P5 GA R	BAT-1 P5 GA probe reverse oligo		5' IRDye® 700 - GCAGCAGTGAGGATTAATATCTGATTAATAACG	Generated in this study
	BAT-1 mA F	BAT-1 mA probe forward oligo	30ng/lane	CGTTATACTACATATTAATCCTCACTGCTGC	Generated in this study
	5'-IRDye700-BAT-1 mA R	BAT-1 mA probe reverse oligo		5' IRDye® 700 - GCAGCAGTGAGGATTAATATGTAGTATAACG	Generated in this study
	BAT-1 mB F	BAT-1 mB probe forward oligo	30ng/lane	CGTTATTAATCATATACTACCTCACTGCTGC	Generated in this study
	5'-IRDye700-BAT-1 mB R	BAT-1 mB probe reverse oligo		5' IRDye® 700 - GCAGCAGTGAGGTAGTATATGATTAATAACG	Generated in this study
Coop-seq	HD_coopseq_P3TAAT	randomlized oligo library template	100ng/lane	CAA CTA CTG AGT ACG TAC CGA G TAATNNNATTA AGA TCA GAG ATG ACT GCA GC	Generated in this study
	HD_coopseq_P5TAAT	randomlized oligo library template	100ng/lane	CAA CTA CTG AGT ACG TAC CGA G TAATNNGNNATTA AGA TCA GAG ATG ACT GCA GC	Generated in this study
	5'-IRDye800-coopseq-R	Coop-seq library reverse complement primer		5' IRDye® 800 - GCT GCA GTC ATC TCT GAT CT	Generated in this study
qRT-PCR	mCrx-RT-F	mCrx qRT-PCR forward primer, testing gene		CTGATGCACCAGGCTG	Sun et al. 2022
	mCrx-RT-R	mCrx qRT-PCR reverse primer, testing gene		TGCTGTTTCTGCTGCTGTCG	Sun et al. 2022
	mRho-RT-F	mRho qRT-PCR forward primer, testing gene		GCTTCCCTACGCCAGTGTG	Sun et al. 2022
	mRho-RT-R	mRho qRT-PCR reverse primer, testing gene		CAGTGGATTCTTGCCGCAG	Sun et al. 2022
	DsRed-RT-F	DsRed qRT-PCR forward primer, testing gene		GAAGCACCCCGCCGACATCC	Generated in this study
	DsRed-RT-R	DsRed qRT-PCR reverse primer, testing gene		GGCAGCTGCACGGGCTTCTTGGC	Generated in this study
	mUbb-RT-F	mUbb qRT-PCR forward primer, control gene		CAACATCCAGAAAGAGTCAACC	Sun et al. 2022
	mUbb-RT-R	mUbb qRT-PCR reverse primer, control gene		ATGTTGTAATCAGAGAGGGTGC	Sun et al. 2022

## Sheet: Supplemental Table S2
Supplemental Table S2. Coop-seq measured relative cooperativity index
sequence	lib	MMcount	wt.omega	e80a.omega	k88n.omega	r90w.omega	wt.ln.omega	e80a.ln.omega	k88n.ln.omega	r90w.ln.omega
TAATAAAATTA	P3TAAT	3	0.3791053944155962	0.5917733007081182	0.7465220889560199	0.6038441108657884	-0.969941	-0.524632	-0.29233	-0.504439
TAATAATATTA	P3TAAT	2	0.6801990358995808	0.6350995323373546	2.1653411063440604	0.7436081978664488	-0.38537	-0.453974	0.772578	-0.296241
TAATAAGATTA	P3TAAT	3	1.8790598975540016	0.9676274800098444	3.4917119985280656	1.6578213353274984	0.6307715972803618	-0.0329081	1.2503921599278147	0.5055042917555822
TAATAACATTA	P3TAAT	3	1.547776421672914	1.284895922478159	2.7490972076646227	2.692749315906993	0.4368193342926004	0.25067772088655643	1.0112725696581826	0.9905627221987587
TAATATAATTA	P3TAAT	3	0.3406441286289118	0.4701572707986665	1.6426542295855584	0.3811776584371808	-1.07692	-0.754688	0.4963133662594214	-0.96449
TAATATTATTA	P3TAAT	2	0.8895097954161612	0.6529859607898518	2.8997902792066483	0.825675	-0.117085	-0.4262	1.0646384168624419	-0.191554
TAATATGATTA	P3TAAT	3	1.6492843132320096	0.7156895570904505	3.2011821918554757	1.167240808545492	0.500341	-0.334509	1.1635201765362266	0.15464268038555354
TAATATCATTA	P3TAAT	3	1.7521342142419951	1.0368916142028108	2.857178422413689	2.001706859598291	0.5608345958825954	0.036227405176271446	1.0498345722659952	0.6940002463949437
TAATAGAATTA	P3TAAT	3	0.5019896805290396	0.5508153712540792	1.083520259464281	0.5267700582801155	-0.689176	-0.596356	0.0802152	-0.640991
TAATAGTATTA	P3TAAT	2	1.5637763163195026	0.6132106542530399	2.098369627763174	1.307602410600368	0.4471036116386748	-0.489047	0.7411606754680525	0.26819523939663226
TAATAGGATTA	P3TAAT	3	2.702644502799539	0.7373400993276167	4.464690242097204	1.8965650315875808	0.9942307391478373	-0.304706	1.4961998372516494	0.6400443718766502
TAATAGCATTA	P3TAAT	3	2.213210847572153	0.7961243752723841	3.203989240436246	2.4965528388334217	0.7944443333365806	-0.228	1.1643966710345084	0.9149109158991471
TAATACAATTA	P3TAAT	2	0.508624	0.7648147720104588	1.1117854892649508	0.735965	-0.676046	-0.268122	0.10596727188248842	-0.306573
TAATACTATTA	P3TAAT	1	1.1085386628841298	0.6140914887415578	1.9081350770106733	1.1326994734822748	0.1030426280263199	-0.487611	0.6461263655992107	0.12460369839019914
TAATACGATTA	P3TAAT	2	1.86278	0.9121283177047924	3.9997591323592103	1.4755593384630004	0.6220713376980839	-0.0919746	1.3862341423965823	0.38903713042617694
TAATACCATTA	P3TAAT	2	1.6355322545356423	1.4553715155531306	4.987869146916065	2.014034222834129	0.4919682893155265	0.37526120518039174	1.607008793896311	0.7001397866217762
TAATTAAATTA	P3TAAT	3	0.4298048200283215	0.9820054814255444	1.2182258237722785	1.046249164448866	-0.844424	-0.0181584	0.19739555749820836	0.0452115
TAATTATATTA	P3TAAT	2	0.463585	0.7428548313146767	2.272758239253676	0.6044658688503115	-0.768765	-0.297255	0.8209941772486244	-0.50341
TAATTAGATTA	P3TAAT	3	1.010994030068685	0.8881421575273954	3.4424334733245976	0.6444161065545558	0.010934035044327266	-0.118623	1.2361786263285224	-0.439411
TAATTACATTA	P3TAAT	3	0.8580391533058351	1.57672	3.1106339834036043	2.231721313095152	-0.153106	0.45534782299049115	1.1348265586003443	0.8027731769990459
TAATTTAATTA	P3TAAT	3	0.5427996977602014	0.9392301408835804	1.8917257623179944	0.9433745957526144	-0.611015	-0.0626947	0.6374895142032896	-0.0582918
TAATTTTATTA	P3TAAT	2	0.7095365671108124	0.8954715751399148	2.547996421731763	0.910158	-0.343143	-0.110405	0.9353073333650388	-0.0941376
TAATTTGATTA	P3TAAT	3	0.7252187178659193	0.7133986845707846	2.4226771984192466	0.579198	-0.321282	-0.337715	0.8848732090299681	-0.54611
TAATTTCATTA	P3TAAT	3	0.8672061317051444	1.266795571424237	2.276296191264443	1.5572382645965657	-0.142479	0.23649053980020057	0.8225496445564523	0.4429139091446345
TAATTGAATTA	P3TAAT	3	0.7568657117886552	0.9235220616281716	1.6038109206200133	1.0254727830007175	-0.278569	-0.0795606	0.4723826225832299	0.0251538
TAATTGTATTA	P3TAAT	2	0.7712666809983653	0.7959727197595644	2.114036093341176	0.9412394302840348	-0.259721	-0.22819	0.7485989607844036	-0.0605577
TAATTGGATTA	P3TAAT	3	1.789453207637972	0.8256259437584026	3.7402173048194816	1.3567741956357884	0.5819101025937067	-0.191613	1.3191437126314425	0.30510996732791057
TAATTGCATTA	P3TAAT	3	0.8982075123071636	0.8668744017591246	3.840855254972976	1.215551264521527	-0.107354	-0.142861	1.3456950644498409	0.1951976895502645
TAATTCAATTA	P3TAAT	2	0.6235239168103848	1.0050112521764294	1.4362494221443176	0.9299369294292092	-0.472368	0.00499874	0.36203514784432805	-0.0726385
TAATTCTATTA	P3TAAT	1	0.5377464386426615	0.6905397124407724	1.7879518192006032	0.4711339504711267	-0.620368	-0.370282	0.5810707296324373	-0.752613
TAATTCGATTA	P3TAAT	2	0.8369291048407856	0.7005519173824171	4.157067650908722	0.4990972113751959	-0.178016	-0.355887	1.424809934111793	-0.694954
TAATTCCATTA	P3TAAT	2	1.6053233071251298	1.785918523025571	4.737875159155281	2.1619197534801797	0.4733251737573181	0.579933	1.5555887565408457	0.7709966017289943
TAATGAAATTA	P3TAAT	2	0.6834557872056218	1.0061230292435617	1.2921567996449572	1.4404449820051155	-0.380593	0.00610436	0.25631275995094516	0.36495208113385114
TAATGATATTA	P3TAAT	1	1.8520872147931648	1.087470769351671	3.356335046045356	2.2188638217296908	0.6163132273361152	0.0838546	1.210849618557826	0.7969952728603007
TAATGAGATTA	P3TAAT	2	2.83885	1.2183752250243995	3.575432798582107	2.569355382336414	1.0433975220983793	0.19751818836745308	1.2740862313589425	0.9436550434519163
TAATGACATTA	P3TAAT	2	2.134217790825715	1.8193321535151457	2.7559758667528764	3.945980221779256	0.7581002052286111	0.5984694851285335	1.0137715964922005	1.3726973953677042
TAATGTAATTA	P3TAAT	2	0.9746191258981568	1.2030264279158012	3.368338319546808	1.575224289435583	-0.0257085	0.18484040509355318	1.2144195425070543	0.45439766812967214
TAATGTTATTA	P3TAAT	1	2.5906731116452044	1.4377900161378965	5.16511	3.778408332229095	0.9519177306123391	0.36310722369729964	1.6419259414246767	1.3293028448241795
TAATGTGATTA	P3TAAT	2	3.317492416715836	1.3142085015309248	4.464132678051828	2.9478886812471057	1.1992092013786095	0.27323458443873505	1.4960749464231302	1.0810892128431389
TAATGTCATTA	P3TAAT	2	2.6583651206926304	1.6968132187766105	3.783063673077296	4.276669067650408	0.9777113175586285	0.528752	1.3305341768804586	1.4531744513740263
TAATGGAATTA	P3TAAT	2	2.0341185611509003	1.878549713269724	5.745692090216236	2.458808804126684	0.7100625855789693	0.6305000500254564	1.7484503723158848	0.8996770067042562
TAATGGTATTA	P3TAAT	1	2.99606	1.7265796388171133	9.123084498836068	2.5813258859798025	1.0972966959565347	0.5461423641035759	2.210807959496928	0.9483031762218659
TAATGGGATTA	P3TAAT	2	5.623228780583145	1.4170356923720526	13.838982773014203	3.07762	1.7269060150523947	0.3485671490801299	2.6274894484286677	1.124155393708326
TAATGGCATTA	P3TAAT	2	2.23648	1.5110418140808817	11.278948426585742	2.421090192866449	0.8049043827225663	0.41279935602543333	2.4229380171307677	0.8842179316471445
TAATGCAATTA	P3TAAT	1	0.7116143666312802	0.9912839527716332	2.9114802236243333	1.240842703630434	-0.340219	-0.00875425	1.0686616197678755	0.21579074849560326
TAATGCTATTA	P3TAAT	0	1.916879274778992	0.8484001378322024	4.379032016922176	2.712076035308202	0.6506984859609667	-0.164403	1.4768276992614013	0.9977144063031991
TAATGCGATTA	P3TAAT	1	3.0408428345567127	1.2445068876122307	6.867057788020077	2.614217462902096	1.1121347252013927	0.2187393772515211	1.926735744925699	0.960965
TAATGCCATTA	P3TAAT	1	1.6147122078469491	1.4900207502202358	7.996399618142197	2.271542704696329	0.47915674131963354	0.39879004618270336	2.078991392645735	0.8204592062591018
TAATCAAATTA	P3TAAT	3	0.4159168090026719	0.6683442752572525	1.2138	0.478125	-0.87727	-0.402952	0.1937550711804002	-0.737882
TAATCATATTA	P3TAAT	2	1.285241404275948	0.6649600069541782	3.003912229543518	0.9999426589059738	0.25094656395285747	-0.408028	1.09992	-5.73427e-05
TAATCAGATTA	P3TAAT	3	1.819754824658497	0.6746595449021862	3.365818123262606	0.8701758306650367	0.5987017802881639	-0.393547	1.2136710608157655	-0.13906
TAATCACATTA	P3TAAT	3	1.84743	1.2124788374565976	3.088388884021801	2.238533614133894	0.6137934518584388	0.19266689003314136	1.1276495581783998	0.8058210149515146
TAATCTAATTA	P3TAAT	3	0.5762006614950514	0.6663030676726456	3.175785862715788	0.4074746521266488	-0.551299	-0.406011	1.1555551175336654	-0.897777
TAATCTTATTA	P3TAAT	2	2.690115144275389	1.061689583215781	5.210828258999221	2.312937724090912	0.9895839972610002	0.0598616	1.650738817986009	0.8385184585854583
TAATCTGATTA	P3TAAT	3	1.9852632901682965	0.7621652331252095	3.516213840512433	0.9675424539448388	0.685752	-0.271592	1.2573847972318857	-0.032996
TAATCTCATTA	P3TAAT	3	2.2253189906103343	1.2068422981306417	3.9592379865941263	2.0551915813063246	0.7999002719086419	0.18800727751505597	1.376051579122072	0.7203690705158927
TAATCGAATTA	P3TAAT	3	0.9944244760011224	0.6990566123316031	3.8432206814843854	0.5953282664834526	-0.00559113	-0.358024	1.346310734207841	-0.518642
TAATCGTATTA	P3TAAT	2	2.7937186679504715	1.0278486446465207	5.988585026324297	2.1220797243030725	1.0273735642655675	0.027467923359031816	1.7898551615720253	0.7523966098456437
TAATCGGATTA	P3TAAT	3	2.8745228041896147	0.9594764134157526	6.394431360606844	1.4408695865965635	1.0558866793214796	-0.0413675	1.855427511703803	0.36524681090695443
TAATCGCATTA	P3TAAT	3	2.72442	1.1145695330021863	6.484676245273904	2.9194970031299863	1.0022572729650836	0.10846826131190214	1.8694418928944103	1.0714113422398104
TAATCCAATTA	P3TAAT	2	0.7151992450104009	0.748323	2.189969563225067	0.9410182154358224	-0.335194	-0.28992	0.7838876456610847	-0.0607928
TAATCCTATTA	P3TAAT	1	2.081132194880793	0.6443271149012693	5.032773331995441	1.687281159680641	0.7329120700843236	-0.439549	1.6159711904191258	0.523118
TAATCCGATTA	P3TAAT	2	2.2080773432845824	0.60667	5.316571951900806	1.1412361103722706	0.7921221564628553	-0.499771	1.6708287257145569	0.13211198231389573
TAATCCCATTA	P3TAAT	2	2.300012008715347	1.0804570059985164	8.781843717139132	2.126282632248407	0.8329143441020592	0.0773841	2.172686376164637	0.7543752119345193
TAATAAGAAATTA	P5TAAT	4	0.4000579156084198	0.5974164854765799	0.2824380970596247	0.6270949404964262	-0.916146	-0.515141	-1.2643	-0.466657
TAATAAGATATTA	P5TAAT	3	1.2549647475856351	0.9169922176985922	0.8325301083429592	1.099515760495697	0.22710748261602867	-0.0866563	-0.183286	0.0948699
TAATAAGAGATTA	P5TAAT	4	0.642557	0.7624327675244992	0.6087108911326921	0.4164190700169629	-0.4423	-0.271241	-0.496412	-0.876063
TAATAAGACATTA	P5TAAT	4	1.0382285872507957	1.2657377331394946	0.6015352640918719	1.5130644244746347	0.037516	0.23565514044386632	-0.50827	0.4141370145174262
TAATAAGTAATTA	P5TAAT	4	0.5266708044926842	0.7593930372031247	0.552333	0.596953	-0.64118	-0.275236	-0.593604	-0.515916
TAATAAGTTATTA	P5TAAT	3	1.0920877690751185	0.993339	0.8182092017754803	0.9552180117410172	0.0880912	-0.00668307	-0.200637	-0.0458157
TAATAAGTGATTA	P5TAAT	4	1.1234703780239526	0.8796116766491692	0.6467018855603902	0.6604180979330238	0.11642244649588779	-0.128275	-0.43587	-0.414882
TAATAAGTCATTA	P5TAAT	4	0.8831500733211154	1.2528147607796765	0.4634267529846805	1.1532855692974116	-0.12426	0.22539282841653419	-0.769107	0.14261488563996538
TAATAAGGAATTA	P5TAAT	4	0.8489113473261434	0.8900782337743759	0.5482130926120093	0.7246763634120438	-0.163801	-0.116446	-0.601091	-0.32203
TAATAAGGTATTA	P5TAAT	3	1.2580378157808454	1.1667644650219242	0.6944018623272074	0.9371126875179848	0.22955321806559462	0.15423450347560747	-0.364704	-0.0649517
TAATAAGGGATTA	P5TAAT	4	1.511617636413519	0.8562325663013809	1.0760951839892745	0.7675896332398666	0.4131803598063977	-0.155213	0.0733389	-0.2645
TAATAAGGCATTA	P5TAAT	4	1.0853575065411745	1.287368876489137	0.9801610884228416	1.1243926352727838	0.0819094	0.2526005048657694	-0.0200383	0.11724301011130743
TAATAAGCAATTA	P5TAAT	3	1.13828	1.2733652370857207	0.4355827770542599	1.2931142266798734	0.1295148591976052	0.24166318893941727	-0.83107	0.2570534382542548
TAATAAGCTATTA	P5TAAT	2	1.152294497977798	1.11989	0.6933692965047061	1.059996562157619	0.14175517020893513	0.11322939380468482	-0.366193	0.0582657
TAATAAGCGATTA	P5TAAT	3	1.2898090711152874	0.9929272337335068	0.918721	0.6374323572931982	0.2544942005321064	-0.0070979	-0.0847725	-0.450307
TAATAAGCCATTA	P5TAAT	3	2.0261635999883296	1.8203700915073853	1.0405212178263363	2.194577058438569	0.7061441528073978	0.5990398273985886	0.0397218	0.7859893438785153
TAATATGAAATTA	P5TAAT	4	0.6533848599639774	0.8173230351172153	0.6396355931680898	0.7447346877898519	-0.425589	-0.201721	-0.446857	-0.294727
TAATATGATATTA	P5TAAT	3	1.320063891151755	1.1220130434735545	1.414312023967671	1.0086761650771388	0.2776801378146149	0.11512443223217887	0.34664321071762483	0.00863874
TAATATGAGATTA	P5TAAT	4	1.5399266910970388	1.1204392146102318	1.4724238413952124	0.6676739010361779	0.43173481210872927	0.11372076433596691	0.38690991459159085	-0.403955
TAATATGACATTA	P5TAAT	4	1.133090297751998	1.3605821261428015	1.284540042378683	1.444103213749335	0.12494867679778225	0.30791264209610125	0.25040071059587843	0.3674885155819723
TAATATGTAATTA	P5TAAT	4	0.9977463064257802	0.8719086944408584	1.2704123082728438	0.7091037647516089	-0.00225624	-0.137071	0.23934149996572462	-0.343753
TAATATGTTATTA	P5TAAT	3	1.5205317911888887	1.2932471002425074	1.460564069238095	1.1674003986050066	0.41906013629479705	0.25715618767396486	0.37882270989998307	0.15477939523430578
TAATATGTGATTA	P5TAAT	4	1.8335630883152607	1.0849238637610217	1.480649376361694	0.8465788980383341	0.6062611166175408	0.0815098	0.3924807593575302	-0.166552
TAATATGTCATTA	P5TAAT	4	1.4281125015559235	1.2862213625417218	1.114225896572418	1.2088469394453294	0.35635364341639375	0.2517087436164007	0.10815990063605786	0.18966696266301572
TAATATGGAATTA	P5TAAT	4	1.336777367079944	1.2849459106046857	0.7477711453602882	1.0393557502175128	0.2902617674854223	0.25071662454661003	-0.290658	0.0386011
TAATATGGTATTA	P5TAAT	3	1.7469571101262316	1.4048922070663126	1.0683309679312425	1.121582452477168	0.5578754802645338	0.3399605788932628	0.0660976	0.11474059209481875
TAATATGGGATTA	P5TAAT	4	2.0795558868081643	1.0310292454230454	1.7798056115249898	1.1284400547902909	0.732154	0.030557570707242205	0.5765041513320416	0.12083619649398109
TAATATGGCATTA	P5TAAT	4	1.2317183789097164	1.1121198074868204	1.0325228697522908	1.0972739487878158	0.20841025043367575	0.10626793057049667	0.0320052	0.0928289
TAATATGCAATTA	P5TAAT	3	1.2555597805675554	1.322732888353784	0.9158770672691624	1.5498701221149471	0.22758151343021887	0.27969996630095223	-0.0878731	0.438171
TAATATGCTATTA	P5TAAT	2	1.9795910698819856	1.347558337978731	1.1040170130765188	1.2734250424574738	0.68289	0.29829431635458853	0.0989554	0.2417101542292132
TAATATGCGATTA	P5TAAT	3	2.4334463187064026	1.7761432629295586	1.5686656857886023	1.2626022278670337	0.8893084907533847	0.5744443073805869	0.4502253763427319	0.2331748514572239
TAATATGCCATTA	P5TAAT	3	1.6250833361701384	1.2803267498986337	1.4332831396905354	1.5686017983642797	0.4855590982637401	0.2471153187131335	0.3599677145976772	0.45018464827306354
TAATAGGAAATTA	P5TAAT	4	0.6508479516246484	0.717348	0.3150164492834509	0.8355297734226605	-0.429479	-0.332194	-1.15513	-0.179689
TAATAGGATATTA	P5TAAT	3	2.765594384705639	1.2152364966510485	0.8142628937749615	2.651740031059781	1.017255579215941	0.1949387053005775	-0.205472	0.975216
TAATAGGAGATTA	P5TAAT	4	1.2567628748149924	1.139671141337539	0.7140301180935132	0.5893096137885546	0.2285392680695964	0.1307397482792751	-0.33683	-0.528804
TAATAGGACATTA	P5TAAT	4	1.409808823337495	1.2835630646966576	0.4784419652625839	1.4771925209455108	0.34345410891196104	0.24963985506288608	-0.73722	0.3901433409896217
TAATAGGTAATTA	P5TAAT	4	0.980638	0.8791137813015462	0.7344075602251405	0.7288863650830796	-0.0195519	-0.128841	-0.308691	-0.316237
TAATAGGTTATTA	P5TAAT	3	1.5961161150135337	1.129452879496181	0.7866042768424161	1.1922626272361905	0.46757325014906825	0.12173333803549727	-0.24003	0.17585286923777588
TAATAGGTGATTA	P5TAAT	4	1.5617546285783854	0.9873510204267754	0.7017120285914871	0.9146028280201086	0.44580995109989924	-0.0127297	-0.354232	-0.0892654
TAATAGGTCATTA	P5TAAT	4	1.3443062014235112	1.1407606061417457	0.5079224160848649	1.2222399341312618	0.2958780445921124	0.13169523829847643	-0.677427	0.20068518691909093
TAATAGGGAATTA	P5TAAT	4	1.313365556521282	1.2517825425289402	0.5404662546971043	1.0872600622232282	0.2725929697630402	0.22456856951645973	-0.615323	0.0836608
TAATAGGGTATTA	P5TAAT	3	1.7766316459516096	1.4495331685535418	0.7743186634393889	1.1939386265809195	0.5747192378434803	0.37124155187288366	-0.255772	0.17725761212578878
TAATAGGGGATTA	P5TAAT	4	1.57926	0.9610292912774976	1.0686061536252711	0.7814983446922512	0.4569534361669057	-0.0397504	0.0663551	-0.246542
TAATAGGGCATTA	P5TAAT	4	1.2672540477856795	1.1478203415798314	0.6037526495246369	1.2110226605762702	0.2368523925145039	0.13786478876877994	-0.504591	0.19146517668016844
TAATAGGCAATTA	P5TAAT	3	1.4731207311338692	1.406206523893697	0.4764379844131581	1.3592138358721952	0.387383	0.3408956701504133	-0.741418	0.306906
TAATAGGCTATTA	P5TAAT	2	2.2852316066626246	1.336454422590461	0.6676272351514525	1.7050570457521612	0.8264673787994019	0.2900201539505976	-0.404025	0.5335985680949326
TAATAGGCGATTA	P5TAAT	3	2.211896269903524	1.3634183259938588	0.8404253435223031	0.998392	0.7938501883035218	0.30999502124821754	-0.173847	-0.00160946
TAATAGGCCATTA	P5TAAT	3	1.7382215211985417	1.5310750716234944	1.135685702973786	2.1131414841623237	0.5528624762577389	0.4259701498453766	0.1272366121013352	0.7481756952954071
TAATACGAAATTA	P5TAAT	3	0.388952	0.7583477500116521	0.4724685086420515	0.5129829945839984	-0.944299	-0.276613	-0.749784	-0.667513
TAATACGATATTA	P5TAAT	2	1.071464270305421	0.9074610176750296	0.892089	0.8414749148781481	0.0690262	-0.0971047	-0.114189	-0.172599
TAATACGAGATTA	P5TAAT	3	0.95149	0.9196916500829748	0.7313025762654265	0.4184818900477024	-0.0497262	-0.0837168	-0.312928	-0.871122
TAATACGACATTA	P5TAAT	3	0.7489060954320675	1.1632986700634114	0.7375604674318247	1.0691944323244746	-0.289142	0.15125965059520513	-0.304407	0.0669055
TAATACGTAATTA	P5TAAT	3	0.7615022510073334	0.9667743201145012	0.89345	0.662477	-0.272462	-0.0337902	-0.112665	-0.411769
TAATACGTTATTA	P5TAAT	2	1.2767180568416765	1.2076328748965246	1.021719928072305	1.02893	0.24429276711508952	0.1886621418126621	0.021487411242784103	0.0285152
TAATACGTGATTA	P5TAAT	3	1.157685429043273	1.04552	0.910108	0.7094671939172033	0.14642269202549998	0.0445175	-0.0941919	-0.343241
TAATACGTCATTA	P5TAAT	3	1.1537747853554308	1.3002641991031367	0.5942748820554693	1.1185263998748174	0.14303898903575668	0.26256747389839197	-0.520413	0.11201210459736788
TAATACGGAATTA	P5TAAT	3	0.8131086382237882	0.902024	0.5751697617372216	0.6861258162367063	-0.206891	-0.103114	-0.55309	-0.376694
TAATACGGTATTA	P5TAAT	2	1.3317381382013114	1.106823927048438	0.7234571975840783	0.8983050473048375	0.2864849598493135	0.10149458691926001	-0.323714	-0.107246
TAATACGGGATTA	P5TAAT	3	1.3198824906742097	0.740239	1.029830183895751	0.5521475456978798	0.277543	-0.300782	0.0293939	-0.59394
TAATACGGCATTA	P5TAAT	3	0.7025298871973285	0.9474930310783188	0.6669485389801165	0.8379365841408664	-0.353067	-0.0539357	-0.405042	-0.176813
TAATACGCAATTA	P5TAAT	2	0.9848295630456476	1.3292602641242357	0.4905070389097531	1.0783057653588737	-0.0152867	0.28462259511350696	-0.712316	0.0753911
TAATACGCTATTA	P5TAAT	1	1.1980779548475446	1.082254607738261	0.7621710629665454	0.793684	0.1807185684005711	0.0790465	-0.271584	-0.23107
TAATACGCGATTA	P5TAAT	2	1.54928	1.1790159179055837	0.8246515617812352	0.6554826913295508	0.43778763689821293	0.16468012265627655	-0.192794	-0.422383
TAATACGCCATTA	P5TAAT	2	1.0778579560122266	1.5479173857127615	0.7739743859663664	1.045396393460747	0.0749757	0.4369104053407826	-0.256216	0.044396137377539543
TAATTAGAAATTA	P5TAAT	4	0.4621705670489431	0.7818213519519606	0.3237584525530626	0.8068131839470223	-0.771821	-0.246129	-1.12776	-0.214663
TAATTAGATATTA	P5TAAT	3	0.8620336921484743	0.858856	0.8466891584058305	0.6506173570008258	-0.148461	-0.152154	-0.166422	-0.429834
TAATTAGAGATTA	P5TAAT	4	0.9959608591104137	0.931755	0.7414082242149764	0.5134893813827909	-0.00404732	-0.0706855	-0.299204	-0.666526
TAATTAGACATTA	P5TAAT	4	1.0104610607390283	1.2563394891835151	0.6422370771668787	1.6020878274560206	0.010406722471883715	0.22820232545910185	-0.442798	0.47130767077388197
TAATTAGTAATTA	P5TAAT	4	0.618178	0.7798304469973776	0.6241961818983345	0.5981709649679826	-0.480979	-0.248679	-0.471291	-0.513879
TAATTAGTTATTA	P5TAAT	3	0.9626336609193384	0.868468	0.9019313775746456	0.7360289885114878	-0.0380824	-0.141025	-0.103217	-0.306486
TAATTAGTGATTA	P5TAAT	4	1.0881134749987096	0.9317846902507444	0.9202330682372836	0.5666392456708228	0.0844454	-0.0706535	-0.0831283	-0.568032
TAATTAGTCATTA	P5TAAT	4	1.0728805414078115	1.2322604751351545	0.678348	1.1826352040555803	0.0703471	0.20885026738698256	-0.388095	0.16774517231564212
TAATTAGGAATTA	P5TAAT	4	1.0798653255485955	1.3530821823235828	0.6095817189663889	0.9108153450140358	0.0768363	0.30238508815965853	-0.494982	-0.0934151
TAATTAGGTATTA	P5TAAT	3	1.109579977384724	1.0820189876827104	1.0624319946876433	0.8430490203079597	0.1039815449608683	0.0788287	0.0605606	-0.17073
TAATTAGGGATTA	P5TAAT	4	1.6241200924756805	0.9807342689736342	1.6172042334054475	0.8435899381026004	0.48496618757419435	-0.0194537	0.48069887651877663	-0.170089
TAATTAGGCATTA	P5TAAT	4	0.9953384542478336	1.1869775604055175	1.196748804814868	1.1455873221737405	-0.00467244	0.17141021098844977	0.17960855059758074	0.13591745062472435
TAATTAGCAATTA	P5TAAT	3	1.190332563409477	1.4593410984748345	0.5596763256148699	1.5644776608158213	0.17423273313033558	0.3779850314381636	-0.580397	0.44755200522384764
TAATTAGCTATTA	P5TAAT	2	0.8039606999583145	0.9344439755362484	0.8130876313829525	0.7194118597373479	-0.218205	-0.0678036	-0.206916	-0.329321
TAATTAGCGATTA	P5TAAT	3	1.6449919516084426	1.1895651406104166	1.4322714137875567	0.8144071481196372	0.49773549156612157	0.17358781227986103	0.3592615853468559	-0.205295
TAATTAGCCATTA	P5TAAT	3	1.4412268871150364	1.6146849098316514	1.2168417608545865	2.060942673407874	0.3654947557787257	0.47913983536827254	0.19625878160297058	0.7231634865810981
TAATTTGAAATTA	P5TAAT	4	0.9637680049714424	1.1541996093831306	0.7881494610405364	1.5789030909874455	-0.0369047	0.14340712486383703	-0.238068	0.4567303597279023
TAATTTGATATTA	P5TAAT	3	1.0744785218132509	0.9097180219137088	1.3024703726360063	0.9594183069346324	0.0718354	-0.0946206	0.2642627478500231	-0.0414281
TAATTTGAGATTA	P5TAAT	4	2.119903245267019	1.3843333641601734	1.334178993873978	1.2489623303199542	0.7513704486174381	0.3252186982488716	0.28831611680865227	0.22231307081668833
TAATTTGACATTA	P5TAAT	4	1.2696922116945324	1.3995471153747092	1.015943681624764	2.4124632935450987	0.23877451810183556	0.3361486952692891	0.015817916148220375	0.8806483390044131
TAATTTGTAATTA	P5TAAT	4	0.9698862510626864	0.8531910028084484	0.923327	0.884113	-0.0305765	-0.158772	-0.0797713	-0.123171
TAATTTGTTATTA	P5TAAT	3	1.4847934677593746	1.1246019107567813	1.2009807033471651	1.240007461636237	0.39527568363237287	0.11742911592910144	0.18313847581403492	0.21511739704741903
TAATTTGTGATTA	P5TAAT	4	1.5133554541022454	0.9543735090759778	0.9886470793048748	0.814111	0.4143293405264957	-0.0467002	-0.0114179	-0.205658
TAATTTGTCATTA	P5TAAT	4	1.468252378101357	1.3488131866783624	0.8048909007989594	1.7291864975958295	0.3840728351034008	0.29922508481787263	-0.217049	0.5476510653120988
TAATTTGGAATTA	P5TAAT	4	1.499354401394312	1.3385430561273417	0.8267163510210295	1.3743039135803794	0.40503461638944105	0.29158175090755944	-0.190294	0.31794735826462345
TAATTTGGTATTA	P5TAAT	3	1.4004229538978552	1.0842814030147256	1.0134206652389348	1.055164800939956	0.3367743009222375	0.0809175	0.013331405838076764	0.053696964150367676
TAATTTGGGATTA	P5TAAT	4	2.4001710203177327	0.9968582740118968	1.694472512151722	1.349940680673731	0.87554	-0.00314667	0.5273714901285678	0.3000606512432567
TAATTTGGCATTA	P5TAAT	4	1.1680544964077315	1.083799631512798	0.9956970760712592	1.3316431426686366	0.15533954120092192	0.080473	-0.00431221	0.28641362531422654
TAATTTGCAATTA	P5TAAT	3	1.4382348341400413	1.4832473154902568	0.8350541707196066	2.3218309586336834	0.3634165520437836	0.39423381627144954	-0.180259	0.8423560807262973
TAATTTGCTATTA	P5TAAT	2	1.143067369340143	1.0573948128144033	1.1495886325861353	1.017489038097024	0.13371532388075708	0.0558082	0.13940416758672614	0.0173379
TAATTTGCGATTA	P5TAAT	3	2.470231822547476	1.4092179454579694	1.5234258595065746	1.3130464703837743	0.9043120015181333	0.3430349019042665	0.4209616536756634	0.2723499872181775
TAATTTGCCATTA	P5TAAT	3	1.9265188752168096	1.6500526172964685	1.4736826803964465	2.5685190139038507	0.6557146827089616	0.5008071766746242	0.3877644927058131	0.9433294736246107
TAATTGGAAATTA	P5TAAT	4	1.1607040065416028	1.2275182173866797	0.4987845008785987	1.850399373289988	0.14902672321865498	0.20499442162462286	-0.695581	0.6154014932460964
TAATTGGATATTA	P5TAAT	3	1.329779099524701	1.122908889410164	0.7563568426301384	1.4452210881225007	0.2850128378561625	0.11592254104036498	-0.279242	0.36826231202165877
TAATTGGAGATTA	P5TAAT	4	1.867905814929996	1.3145361143091636	0.7221436284523904	1.3052526076801427	0.6248179182624848	0.2734838386096886	-0.325531	0.26639659114613273
TAATTGGACATTA	P5TAAT	4	1.1975468148572466	1.256517205587502	0.5975647641398639	2.4101829156384653	0.18027514336530023	0.2283437711727814	-0.514893	0.8797026432275825
TAATTGGTAATTA	P5TAAT	4	1.1674066179481473	1.0647994097499398	0.7949080542940827	1.2544635196341576	0.1547847227351199	0.0627864	-0.229529	0.226708
TAATTGGTTATTA	P5TAAT	3	1.4233129413489725	1.1093939953534604	0.7313408830258363	1.5277880390009118	0.35298721154869556	0.1038139161071873	-0.312876	0.4238209631907662
TAATTGGTGATTA	P5TAAT	4	1.6394263297798155	1.172901346401798	0.6858118985853403	1.2426036032594492	0.4943463817274492	0.1594804624701457	-0.377152	0.21720885841747484
TAATTGGTCATTA	P5TAAT	4	1.4282899929494377	1.4150002016945675	0.5816723042249508	2.041212662976935	0.35647791959531744	0.3471296736355212	-0.541848	0.7135440738808405
TAATTGGGAATTA	P5TAAT	4	1.6121467242196783	1.4775157030875732	0.5242938068221313	1.6112736823812437	0.4775666599297623	0.3903620983888955	-0.645703	0.47702497330521004
TAATTGGGTATTA	P5TAAT	3	1.4691984835987422	1.1758741938448525	0.623773	1.363108614382625	0.3847170028356592	0.1620118657307937	-0.471968	0.30976783727436463
TAATTGGGGATTA	P5TAAT	4	2.01983	1.1166740094905616	1.0460918058791278	1.4075488322130505	0.703014	0.1103546328104353	0.0450611	0.34185
TAATTGGGCATTA	P5TAAT	4	1.1450401754251651	1.0813506166613018	0.6842881770221605	1.4015386816605615	0.13543972409821156	0.0782108	-0.379376	0.337571
TAATTGGCAATTA	P5TAAT	3	1.2560135910278123	1.4580721213387744	0.5637795311000404	2.35495	0.22794288886947778	0.37711509830186996	-0.573092	0.8565211013302484
TAATTGGCTATTA	P5TAAT	2	1.289441735351925	1.053297997838765	0.6793697161754054	1.3315757578687404	0.25420936141144007	0.0519262	-0.38659	0.2863630212877254
TAATTGGCGATTA	P5TAAT	3	2.4670283599043423	1.6473953495530904	0.9040866800702526	1.4121366234113006	0.9030143331861881	0.499195	-0.10083	0.34510389318009355
TAATTGGCCATTA	P5TAAT	3	1.7406574405679411	1.4728017119681287	0.9784961376197264	2.896458397046426	0.554263	0.38716651332614826	-0.0217384	1.0634887482704567
TAATTCGAAATTA	P5TAAT	3	0.6132717542656516	1.0378397705735936	0.5402978945157819	0.6999011147339286	-0.488947	0.037141409219153994	-0.615635	-0.356816
TAATTCGATATTA	P5TAAT	2	0.8079735100426246	0.9734461360926164	0.9051418346551512	0.6469447739384404	-0.213226	-0.0269128	-0.0996636	-0.435494
TAATTCGAGATTA	P5TAAT	3	1.0600353672387468	0.9743654405806944	0.7973087492065632	0.4886341988657192	0.0583023	-0.0259689	-0.226513	-0.716141
TAATTCGACATTA	P5TAAT	3	1.0234167701645789	1.308445745473784	0.7188587434778738	1.2518731707799309	0.023146803970031268	0.2688399789826918	-0.33009	0.22464096625259924
TAATTCGTAATTA	P5TAAT	3	0.8105934929162039	0.8869623812196535	1.0551495795191106	0.6905162481173865	-0.209989	-0.119953	0.0536825	-0.370316
TAATTCGTTATTA	P5TAAT	2	1.1459537158774682	1.1268448671644935	0.94086	0.8600640567174545	0.13623722993547283	0.11942157444220687	-0.0609614	-0.150748
TAATTCGTGATTA	P5TAAT	3	1.096037899459451	0.8896538370125008	0.7903542452716558	0.6087890606468077	0.0917018	-0.116923	-0.235274	-0.496283
TAATTCGTCATTA	P5TAAT	3	1.1160910874602528	1.2493504326846123	0.6915827040497815	1.0909751093299462	0.10983248021646196	0.22262376239504247	-0.368773	0.0870719
TAATTCGGAATTA	P5TAAT	3	0.8732167151043911	0.8880111207358934	0.5652015188553534	0.620048	-0.135572	-0.118771	-0.570573	-0.477958
TAATTCGGTATTA	P5TAAT	2	0.9173097579295976	0.8892053488950112	0.7626456952220954	0.6911459252291163	-0.0863101	-0.117427	-0.270962	-0.369404
TAATTCGGGATTA	P5TAAT	3	1.2024269520592512	0.7037434610030499	1.112474616388471	0.6227025826563727	0.18434197442434855	-0.351341	0.10658691806848833	-0.473686
TAATTCGGCATTA	P5TAAT	3	0.7584461358824943	0.7666380418552763	0.6213155506940554	0.6342868488099064	-0.276483	-0.265741	-0.475916	-0.455254
TAATTCGCAATTA	P5TAAT	2	1.1662262485766932	1.4333185014500087	0.6809359016830245	1.240438642076908	0.15377310733575822	0.3599923861522926	-0.384287	0.2154650606748355
TAATTCGCTATTA	P5TAAT	1	0.8679621826947004	0.9614271716898546	0.7353351356786427	0.639878	-0.141607	-0.0393365	-0.307429	-0.446478
TAATTCGCGATTA	P5TAAT	2	1.368017000101184	1.12775	0.8388251442386022	0.5860464841743172	0.3133622460976942	0.12022253684337808	-0.175753	-0.534356
TAATTCGCCATTA	P5TAAT	2	1.2320341186067865	1.3096797356293823	0.8327685728728914	1.4034098235073638	0.20866655840220497	0.2697826307049879	-0.182999	0.3389048636030334
TAATGAGAAATTA	P5TAAT	3	0.6318176290546134	0.7907334508571651	0.2928239519872273	1.0937323658055649	-0.459154	-0.234794	-1.22818	0.089596
TAATGAGATATTA	P5TAAT	2	1.481465016551887	1.017275569651749	0.7343299766931962	1.708994765404814	0.39303147422037193	0.017128	-0.308797	0.5359053411707841
TAATGAGAGATTA	P5TAAT	3	0.9952758327683866	1.0421309627766664	0.5606362765683407	0.733568	-0.00473536	0.041267619480301894	-0.578683	-0.309834
TAATGAGACATTA	P5TAAT	3	1.219927739266544	1.3539790884707323	0.5007493136911864	2.410929919560556	0.1987916268816028	0.30304773010991276	-0.69165	0.8800125318170446
TAATGAGTAATTA	P5TAAT	3	0.8003426380276525	0.7755283297852099	0.5619862192186724	0.8732767025373329	-0.222715	-0.254211	-0.576278	-0.135503
TAATGAGTTATTA	P5TAAT	2	1.1014429111843334	1.0015158330781502	0.7381942235744929	1.1561605785954574	0.0966211	0.00151469	-0.303548	0.14510466942284883
TAATGAGTGATTA	P5TAAT	3	1.1743023176422993	0.963636	0.8007410114535156	0.9312003506231328	0.16067419902426605	-0.0370415	-0.222218	-0.0712808
TAATGAGTCATTA	P5TAAT	3	1.3153135935196034	1.295233191161132	0.5678908583161322	1.72611	0.2740751113586796	0.258691	-0.565826	0.545868
TAATGAGGAATTA	P5TAAT	3	1.2621758058343584	1.5135890001800456	0.4563675165499866	1.4344257416059834	0.23283706173389937	0.4144836519661611	-0.784457	0.3607645890526566
TAATGAGGTATTA	P5TAAT	2	1.371258463639946	1.245925137255952	0.6794988256163628	1.325180727781719	0.3157289047960552	0.2198783361011307	-0.3864	0.28154884846260525
TAATGAGGGATTA	P5TAAT	3	1.8972025077830603	1.2193604878240087	0.8977112634766641	1.3967482577882009	0.6403804368542028	0.1983265310012056	-0.107907	0.3341468620237503
TAATGAGGCATTA	P5TAAT	3	1.0693497467997035	1.3980252150056025	0.7562662353495962	1.6735229956550044	0.0670508	0.3350606801336573	-0.279362	0.5149309826295153
TAATGAGCAATTA	P5TAAT	2	1.1651308863990626	1.550930472106575	0.4320676670565728	1.7526280940615393	0.15283342954740264	0.4388550554053223	-0.839173	0.561116
TAATGAGCTATTA	P5TAAT	1	1.66645	1.1053650922523477	0.603986	1.501714032442556	0.5106941041843677	0.10017568062794929	-0.504204	0.406607
TAATGAGCGATTA	P5TAAT	2	1.5060252433722687	1.2955990281316137	0.7407893849988705	1.0892494452272017	0.40947389110459964	0.258973	-0.300039	0.0854889
TAATGAGCCATTA	P5TAAT	2	2.3155349148255424	2.133640359446237	0.9704132915219204	3.1661560482711923	0.8396407255663134	0.7578296098326677	-0.0300332	1.1525182490221826
TAATGTGAAATTA	P5TAAT	3	1.2688052707990378	1.3559479445135325	0.8571229273240971	2.0876259346547026	0.238076	0.30450079977950756	-0.154174	0.7360275039015148
TAATGTGATATTA	P5TAAT	2	1.5941546189644875	1.2999050716724403	1.5684908980767485	1.8556889452432168	0.46634357626884254	0.26229124001083975	0.45011394568419627	0.6182560261607891
TAATGTGAGATTA	P5TAAT	3	2.40133	1.498022102333957	1.3522067417303572	1.7359236898227304	0.8760225610033172	0.40414563954823435	0.3017378814114253	0.5515396577966145
TAATGTGACATTA	P5TAAT	3	1.67721	1.5508719608361303	1.1927379535858331	2.893387569639034	0.5171299330325722	0.43881732813434576	0.17625146566559904	1.062427985095406
TAATGTGTAATTA	P5TAAT	3	1.305897106213999	1.148194381995849	1.190620699412949	1.6412099930427553	0.26689024230946135	0.13819060586000828	0.17447476728478759	0.4954337704308442
TAATGTGTTATTA	P5TAAT	2	1.6896146570876889	1.3482545693889978	1.257428220192217	2.025573616340979	0.5245004893783581	0.2988108443553586	0.2290685400044765	0.7058529277747662
TAATGTGTGATTA	P5TAAT	3	1.6653349432748583	1.2501417389566425	1.058454894327571	1.40248	0.5100262703330599	0.2232569360512315	0.0568102	0.33824189572222285
TAATGTGTCATTA	P5TAAT	3	1.6807286416307363	1.6076411785194946	0.9147867945114596	2.853342252641973	0.5192274146442828	0.4747679981687436	-0.0890643	1.0484910274065806
TAATGTGGAATTA	P5TAAT	3	1.737997500087481	1.524310416771689	0.8356765408788334	2.155018340435536	0.5527335884575174	0.42154212206909786	-0.179514	0.7677992341624359
TAATGTGGTATTA	P5TAAT	2	1.6079310219035134	1.3747022757221188	1.0479285876231528	1.738030335305679	0.47494827301050624	0.31823718092568404	0.046815441996146324	0.5527524808368387
TAATGTGGGATTA	P5TAAT	3	2.7034104364746363	1.221178895027616	1.475370916257983	2.130325059951121	0.9945141005597451	0.19981669957040038	0.3889094268283219	0.7562745783832563
TAATGTGGCATTA	P5TAAT	3	1.2090812235103416	1.2563844103578636	0.9621281438236968	1.7793366454136723	0.18986075176670775	0.2282380804215643	-0.0386076	0.5762406237289416
TAATGTGCAATTA	P5TAAT	2	1.4793806825705575	1.682077670027194	0.8401021613112469	2.5491576522588613	0.391624	0.5200297376708262	-0.174232	0.9357629721510482
TAATGTGCTATTA	P5TAAT	1	1.6271673546681824	1.3953195750916232	1.1191678555889235	1.6809527496689851	0.4868406838371758	0.3331234751243032	0.11258542307473368	0.5193607455656252
TAATGTGCGATTA	P5TAAT	2	2.7623999223801574	1.6983703344777918	1.2854822905059058	1.8566855914142528	1.0160998389949474	0.5296691645078918	0.25113397128189235	0.6187929580813908
TAATGTGCCATTA	P5TAAT	2	2.0375413675179286	1.8601339227551976	1.4378149884303435	3.1541885124988807	0.711744	0.6206484866144167	0.36312459207189074	1.148731256094896
TAATGGGAAATTA	P5TAAT	3	2.162897717144667	1.5941946280163586	1.2146016960266832	2.733551026067064	0.7714488583561462	0.466369	0.19441620084680727	1.0056015061137802
TAATGGGATATTA	P5TAAT	2	3.9615785652259135	1.6422242156532505	1.8385836222987904	2.8316026430548478	1.376642573417824	0.4960515520450248	0.6089955047056734	1.0408428563313787
TAATGGGAGATTA	P5TAAT	3	3.042229101385321	1.634800457648777	1.901515625515912	1.931492502848544	1.1125905037511794	0.49152075264969847	0.6426512658206823	0.6582930215989562
TAATGGGACATTA	P5TAAT	3	2.004189050434674	1.6395183832594644	1.358547360707306	3.535226101397822	0.6952395153174549	0.4944025299627684	0.30641601177735983	1.2627772580945948
TAATGGGTAATTA	P5TAAT	3	1.92185	1.2465967632498969	1.905816554884194	1.8095381548048983	0.65329	0.22041724892678197	0.6449105544742385	0.5930716496268776
TAATGGGTTATTA	P5TAAT	2	2.5913500453229874	1.5288450428072111	1.9265130963763124	2.424833641845233	0.9521789929267397	0.4245125763612989	0.6557116830761842	0.8857629207353348
TAATGGGTGATTA	P5TAAT	3	2.948150568778619	1.533471589138487	1.7748734060130826	1.7563285567231488	1.0811780479137958	0.4275341775916034	0.5737290998279375	0.563226
TAATGGGTCATTA	P5TAAT	3	2.1406724217880004	1.5842753740288331	1.3224090151627377	2.6036119937818296	0.76112	0.46012712552297874	0.2794550847751374	0.9568997093201067
TAATGGGGAATTA	P5TAAT	3	2.9123417501937467	1.7213452307090853	1.3683266291342429	2.165572666466508	1.0689574827182098	0.5431060960134029	0.31358855468779395	0.7726848375475484
TAATGGGGTATTA	P5TAAT	2	2.2730192557040945	1.451163062469243	1.4281004631663572	1.656022657847166	0.8211090163277457	0.37236534696028684	0.3563452138001746	0.5044187381443251
TAATGGGGGATTA	P5TAAT	3	3.045864986544375	1.347752368677254	2.105808956166159	2.113784180849922	1.1137849286528985	0.29843829285301515	0.7446996955258639	0.7484797918154245
TAATGGGGCATTA	P5TAAT	3	1.6781208656495217	1.334948377564655	1.3657821652104187	1.627142970888126	0.5176746350395193	0.28889262261367227	0.3117272793327953	0.4868256983086812
TAATGGGCAATTA	P5TAAT	2	1.806641945968737	1.725425790654114	1.159089344491177	2.515682714670786	0.59147	0.5454738551863418	0.14763464895440426	0.9225442238394446
TAATGGGCTATTA	P5TAAT	1	2.8532213869274683	1.3819615427801455	1.6238464174027525	2.083107487578884	1.0484486671624276	0.3235038977369809	0.4847976667026008	0.7338607632417138
TAATGGGCGATTA	P5TAAT	2	3.709081027028296	2.469150394520446	2.081154525906442	2.270717031477944	1.3107841443266093	0.9038741216389159	0.7329228002560524	0.8200956545137432
TAATGGGCCATTA	P5TAAT	2	2.4425437375726444	1.918996825062989	2.449316213218296	4.654666065715818	0.8930400116619439	0.651803	0.895809	1.5378701714674998
TAATGCGAAATTA	P5TAAT	2	0.589924	1.026239698086184	0.9944793180512574	0.9765408059864638	-0.527762	0.0259013	-0.00553598	-0.0237387
TAATGCGATATTA	P5TAAT	1	1.5771747517833243	0.9630538478119736	1.5106505256989635	1.359646952466996	0.4556351146401737	-0.037646	0.4125403697752754	0.30722507227339685
TAATGCGAGATTA	P5TAAT	2	1.046187852102883	0.979153	1.0799858262507631	0.6957708602567952	0.0451529	-0.0210676	0.0769479	-0.362735
TAATGCGACATTA	P5TAAT	2	0.9247859468626228	1.193367201369229	0.998704	1.5025757249403182	-0.078193	0.17677889237743197	-0.00129669	0.40718078545194475
TAATGCGTAATTA	P5TAAT	2	0.784802	0.99193	1.7458796838277226	0.8427604086324981	-0.242324	-0.00810235	0.5572585454369191	-0.171073
TAATGCGTTATTA	P5TAAT	1	0.92385	1.1267154511818962	1.5255463289516666	0.9690551923879832	-0.0792058	0.11930671975499395	0.4223525943966018	-0.0314337
TAATGCGTGATTA	P5TAAT	2	0.9027010235826431	0.871588	1.0345774817533355	0.5644999020665719	-0.102364	-0.137438	0.033993113178690006	-0.571815
TAATGCGTCATTA	P5TAAT	2	0.9958156591975756	1.217115788669119	1.0600937010548266	1.3651128823696734	-0.00419312	0.19648395218225534	0.058357301438706134	0.31123712292437666
TAATGCGGAATTA	P5TAAT	2	1.0339316307432511	1.0082238039622722	0.9512767751071604	0.9463105712381676	0.0333687	0.00819017	-0.0499502	-0.0551845
TAATGCGGTATTA	P5TAAT	1	0.9907334491806968	0.9323986834665252	1.0401551333739736	0.8157617143914772	-0.00930975	-0.0699948	0.0393699	-0.203633
TAATGCGGGATTA	P5TAAT	2	1.132092110095479	0.643747	1.2250075606208088	0.6448041222541525	0.12406734581298182	-0.44045	0.20294701591299816	-0.438809
TAATGCGGCATTA	P5TAAT	2	0.6945244923303018	0.7889208479165394	0.8697470170077384	0.834856	-0.364528	-0.237089	-0.139553	-0.180496
TAATGCGCAATTA	P5TAAT	1	0.9980794597779362	1.5561650851175792	0.8628147946347782	1.336373152724463	-0.00192239	0.44222451596235474	-0.147555	0.2899593420472982
TAATGCGCTATTA	P5TAAT	0	1	1	1	1	0	0	0	0
TAATGCGCGATTA	P5TAAT	1	1.1925149974106983	0.9502064379602064	1.0367714806176966	0.664171	0.17606452014630644	-0.051076	0.0361115	-0.409216
TAATGCGCCATTA	P5TAAT	1	1.0535239373947336	1.25191	1.3007089475859404	1.362410443775408	0.0521407	0.22466799214249883	0.26290946011820693	0.3092555160558444
TAATCAGAAATTA	P5TAAT	4	0.4525567261746787	0.6022316964018145	0.3182291137724202	0.3750910632270811	-0.792842	-0.507113	-1.14498	-0.980586
TAATCAGATATTA	P5TAAT	3	1.0522771818343946	0.7340886542967281	0.8216707387921289	0.6353359138373956	0.050956560441713386	-0.309125	-0.196416	-0.453601
TAATCAGAGATTA	P5TAAT	4	0.9096377497356268	0.8359099385516745	0.6614151927720751	0.3294257383197292	-0.0947088	-0.179234	-0.413374	-1.1104
TAATCAGACATTA	P5TAAT	4	0.833696	0.962834	0.568463	0.9127819669297228	-0.181886	-0.0378746	-0.564819	-0.0912582
TAATCAGTAATTA	P5TAAT	4	0.7743291165814513	0.8794757047740118	0.6632235663916071	0.5580597295056008	-0.255758	-0.128429	-0.410643	-0.583289
TAATCAGTTATTA	P5TAAT	3	1.30487	0.9571090505543128	0.9354397534904028	0.8146819202892228	0.26610400916849947	-0.0438379	-0.0667385	-0.204958
TAATCAGTGATTA	P5TAAT	4	1.3332880849543671	1.0049984989580902	0.8332599306609317	0.655027	0.28764813559170754	0.00498605	-0.18241	-0.423079
TAATCAGTCATTA	P5TAAT	4	1.1769394315958424	1.061560072453364	0.5999384855710531	0.9622644962606722	0.16291736696748907	0.0597396	-0.510928	-0.0384659
TAATCAGGAATTA	P5TAAT	4	0.9084140547106334	0.9374690572602477	0.641278	0.5719609059956776	-0.096055	-0.0645715	-0.444292	-0.558685
TAATCAGGTATTA	P5TAAT	3	1.1373882014940375	1.1937742084279566	0.8854796267520542	0.7356801073126189	0.12873458261189408	0.17711989191855773	-0.121626	-0.30696
TAATCAGGGATTA	P5TAAT	4	1.2809350204844892	0.8573915344618044	1.41365	0.6953469541424033	0.24759029601090507	-0.153861	0.3461755126900419	-0.363344
TAATCAGGCATTA	P5TAAT	4	0.8703848288397578	0.8271201815605022	0.9032768360796496	0.6495000988438862	-0.13882	-0.189805	-0.101726	-0.431552
TAATCAGCAATTA	P5TAAT	3	0.964509	1.1437488968364569	0.6322307092408215	0.934589	-0.0361358	0.13431137309255564	-0.458501	-0.0676489
TAATCAGCTATTA	P5TAAT	2	1.1089714646310644	0.9265534718670596	0.6666226189372821	0.8170093415608004	0.10343297731677853	-0.0762835	-0.405531	-0.202105
TAATCAGCGATTA	P5TAAT	3	1.40649	1.294445818014101	0.8685855859159647	0.5151178231935903	0.3410978008878503	0.2580826638017005	-0.140889	-0.66336
TAATCAGCCATTA	P5TAAT	3	1.443399404204522	1.3509949076676375	1.0170937448909576	1.1260832834114174	0.367001	0.3008412896649902	0.016949290685519303	0.11874549093560173
TAATCTGAAATTA	P5TAAT	4	0.7464529281603653	1.0067434451899515	0.814795	0.6896993000156247	-0.292423	0.00672081	-0.204819	-0.3715
TAATCTGATATTA	P5TAAT	3	1.5202858615269772	1.0728746387073484	1.4678353374759827	0.8996774302094104	0.4188983839699064	0.0703416	0.38378875596913903	-0.105719
TAATCTGAGATTA	P5TAAT	4	1.6888993898399152	1.150738339278866	1.259195948560516	0.7558634422772234	0.5240770681650525	0.14040377051494057	0.230473	-0.279895
TAATCTGACATTA	P5TAAT	4	1.4350511438942986	1.5288817913544446	1.0351313780454394	1.3898472935544202	0.36120048892094136	0.4245366128754994	0.0345284	0.3291938803552502
TAATCTGTAATTA	P5TAAT	4	0.8785995091110943	0.960991	1.0835247179501604	0.6250421068126266	-0.129426	-0.0397904	0.0802194	-0.469936
TAATCTGTTATTA	P5TAAT	3	1.6253128540043067	1.2611092653099272	0.9968066171069904	0.9642020703957382	0.48570032279214903	0.23199170295922644	-0.00319849	-0.0364544
TAATCTGTGATTA	P5TAAT	4	1.7052087002636591	1.0813361961032524	0.9952673451492766	0.6867467689186514	0.533688	0.0781975	-0.00474389	-0.37579
TAATCTGTCATTA	P5TAAT	4	1.478974272948406	1.3546533460144203	0.8660993200939315	1.1778040743062648	0.39134878868109263	0.30354558840107887	-0.143756	0.16365175077372113
TAATCTGGAATTA	P5TAAT	4	0.9911074888387016	1.092341495954318	0.7762068345594523	0.6902681696236052	-0.00893229	0.0883236	-0.253336	-0.370675
TAATCTGGTATTA	P5TAAT	3	1.374756265110233	1.1021979576836234	0.8572742961618371	0.7453346830104151	0.3182764536678035	0.0973063	-0.153997	-0.293922
TAATCTGGGATTA	P5TAAT	4	1.758004904077259	0.8816531419362665	1.4445488233972326	0.7012104208968728	0.5641795888366024	-0.125957	0.3677970398664496	-0.354947
TAATCTGGCATTA	P5TAAT	4	0.8684432380427085	0.9292257146371288	0.9044302010406652	0.6474061143553009	-0.141053	-0.0734036	-0.10045	-0.434781
TAATCTGCAATTA	P5TAAT	3	1.361262803760773	1.614619789825768	0.8673579138820354	1.428441255447129	0.3084128011056635	0.47909950470148893	-0.142304	0.35658381859993515
TAATCTGCTATTA	P5TAAT	2	1.4173833047804718	1.0969317138312054	1.0277712386819844	0.8423443020853613	0.34881242856104727	0.0925169	0.027392611804399874	-0.171566
TAATCTGCGATTA	P5TAAT	3	2.10572	1.248027471726551	1.2475869560093376	0.681148	0.7446597266155697	0.22156428230636516	0.22121125043021256	-0.383976
TAATCTGCCATTA	P5TAAT	3	1.9162213857742296	1.7182183247634364	1.332349700208249	1.394839474309087	0.6503552186849503	0.5412878962583221	0.2869440753550883	0.3327793364721518
TAATCGGAAATTA	P5TAAT	4	0.8509019460290161	1.0626282625507526	1.0332000508173684	0.8388216497209661	-0.161458	0.0607453	0.0326608	-0.175757
TAATCGGATATTA	P5TAAT	3	2.69002	1.3358240627659923	1.2045845966892508	2.238201081156044	0.9895478610336135	0.2895483768962114	0.18613477447055876	0.8056724544487842
TAATCGGAGATTA	P5TAAT	4	1.372377195475681	1.244708811466282	1.813935000252492	0.6641908936206194	0.31654441533516026	0.21890161618852363	0.5954985187755909	-0.409186
TAATCGGACATTA	P5TAAT	4	1.9100845739448948	1.4258372058855342	0.9350885954996416	1.9030550061588745	0.647148	0.3547591541046058	-0.067114	0.6434604928667786
TAATCGGTAATTA	P5TAAT	4	1.0237576483956514	1.0732642215040542	1.1873126252168094	0.7286210436282994	0.0234798	0.0707047	0.17169245518551143	-0.316602
TAATCGGTTATTA	P5TAAT	3	1.4228213444587077	1.420941105466661	1.2997248430939174	1.1008282034788903	0.3526417627077151	0.35131940241979165	0.26215258290600507	0.0960628
TAATCGGTGATTA	P5TAAT	4	1.3100920386516124	1.3077963284067422	1.080567060145844	0.8683130059429465	0.2700973932577277	0.26834352868333816	0.077486	-0.141203
TAATCGGTCATTA	P5TAAT	4	1.3059550385154186	1.3961981584699004	0.8577197705619454	1.4053127223772994	0.2669346033974701	0.3337529415946209	-0.153478	0.3402598562233391
TAATCGGGAATTA	P5TAAT	4	0.967092	1.255604725278599	0.7161210797726202	0.8279372352105395	-0.033462	0.22761730934159283	-0.333906	-0.188818
TAATCGGGTATTA	P5TAAT	3	1.3529139822550222	1.1577731570311884	0.894582	0.85102	0.3022607715985496	0.14649846793311938	-0.111398	-0.16132
TAATCGGGGATTA	P5TAAT	4	1.6987149080766977	0.9496996220960112	1.6589000930388642	0.7148996626775941	0.5298720287726864	-0.0516095	0.5061547882007639	-0.335613
TAATCGGGCATTA	P5TAAT	4	0.8722743193023323	1.008108371678578	1.0424852309087522	0.7330983998733787	-0.136651	0.00807568	0.0416075	-0.310475
TAATCGGCAATTA	P5TAAT	3	1.485899624994888	1.5715921114226026	0.7396960235751973	1.4923658336753562	0.3960203969043928	0.45208918923334884	-0.301516	0.4003626685590872
TAATCGGCTATTA	P5TAAT	2	2.308360273572129	1.2760448098741386	1.0083207134048693	1.4485965966948244	0.8365374341987606	0.24376530176221617	0.00828629	0.37059522340094875
TAATCGGCGATTA	P5TAAT	3	1.7847836069982193	1.493704061297592	1.82178	0.8782127091986103	0.5792971793103989	0.4012589822817369	0.599815	-0.129866
TAATCGGCCATTA	P5TAAT	3	2.3859774547725743	1.6483212627332082	1.4465977736560538	2.3960296265805896	0.8696088746673669	0.4997573534676448	0.36921443641350826	0.8738130451936973
TAATCCGAAATTA	P5TAAT	3	0.4579811755852284	0.5745523033303505	1.0543388485966123	0.4957227878906606	-0.780927	-0.554164	0.052913886684981995	-0.701738
TAATCCGATATTA	P5TAAT	2	1.3307562071198928	0.7311231116404884	1.52239	0.9233615293637554	0.2857473574370019	-0.313173	0.42028457209195413	-0.0797344
TAATCCGAGATTA	P5TAAT	3	0.9385368559168704	0.6637842909203037	1.266527669992243	0.3598095240386761	-0.0634332	-0.409798	0.23627903782634047	-1.02218
TAATCCGACATTA	P5TAAT	3	0.7973046278454463	0.934105	1.1228048889413496	1.0714205161024597	-0.226518	-0.0681661	0.11582991973671415	0.0689854
TAATCCGTAATTA	P5TAAT	3	0.9329857171056466	0.660977	1.6674796458355017	0.5225780852923612	-0.0693654	-0.414036	0.5113132923376419	-0.648981
TAATCCGTTATTA	P5TAAT	2	1.1911483394052638	0.8878688546738323	1.606226967408121	0.7612467118098841	0.17491783291570895	-0.118931	0.47388793020177156	-0.272798
TAATCCGTGATTA	P5TAAT	3	1.1519885592900176	0.7457454102866999	1.103065396014269	0.4903301477325995	0.1414896310525254	-0.293371	0.098093	-0.712676
TAATCCGTCATTA	P5TAAT	3	1.4005435929451322	1.0540512364488193	0.9899838462166348	0.921194	0.33686044193487297	0.052641060369190563	-0.0100667	-0.0820843
TAATCCGGAATTA	P5TAAT	3	0.6439237299742014	0.6384287983986708	0.8099929242675739	0.3793801235258919	-0.440175	-0.448745	-0.21073	-0.969217
TAATCCGGTATTA	P5TAAT	2	0.8873169559521895	0.650179	1.0551077581387025	0.5063333998822946	-0.119553	-0.430508	0.0536429	-0.68056
TAATCCGGGATTA	P5TAAT	3	0.9941552714780234	0.5410327427469998	1.3518611811893129	0.3980291432722504	-0.00586188	-0.614275	0.30148229571404217	-0.92123
TAATCCGGCATTA	P5TAAT	3	0.5295508044357713	0.5271926231511544	0.8358847825413986	0.4243498844579373	-0.635726	-0.640189	-0.179264	-0.857197
TAATCCGCAATTA	P5TAAT	2	0.9719338015189012	0.8230337985834087	0.8828164628596474	0.8501168068751274	-0.0284676	-0.194758	-0.124638	-0.162382
TAATCCGCTATTA	P5TAAT	1	1.1091959273530387	0.6533895308454427	1.0533823138160587	0.5491645093007476	0.10363536305516023	-0.425582	0.0520062	-0.599357
TAATCCGCGATTA	P5TAAT	2	1.0498980017114556	0.6639758070996138	1.4462082404559375	0.4037364737632581	0.048693018223732315	-0.40951	0.368945	-0.906993
TAATCCGCCATTA	P5TAAT	2	1.53825	0.842289	1.1483946477253946	1.137802862521544	0.4306483726607761	-0.171632	0.13836500861771683	0.1290990891701835

## Sheet: Supplemental Table S3
Supplemental Table S3. P3-P5 matched relative cooperativity index (ordered as in Figure 2D left to right)
sequence	wt.delta.omega	e80a.delta.omega	k88n.delta.omega	r90w.delta.omega
TAATCAAATTA	-0.0844279	0.1041611738882709	1.3387387432449722	0.242704
TAATTAAATTA	-0.0726028	0.227971	1.3251531155354046	0.2598746762066602
TAATTACATTA	-0.163512	0.2271454975313891	1.577624322983122	0.331466
TAATGGAATTA	-0.358895	0.087394	1.434861817628091	0.126992
TAATGATATTA	0.2232817531157432	0.0667266	1.5196464104195406	0.2610899316895168
TAATGAAATTA	0.0785612	0.240899	1.484496456956562	0.2753560452661912
TAATTAGATTA	0.0149814	-0.0479379	1.535382521837942	0.2271152953929191
TAATCTGATTA	0.152064	-0.349789	1.2621286865535073	0.3427936839105589
TAATCATATTA	0.1999900035111442	-0.0989029	1.2963310408654714	0.4535440790524351
TAATATCATTA	0.2044809524662015	-0.215481	0.9416746716299376	0.5043332837319281
TAATTCGATTA	-0.491378	-0.476109	1.6005629380745792	-0.160598
TAATTGCATTA	-0.242794	-0.221072	1.725071203100263	-0.142373
TAATCGAATTA	0.0278709	-0.585641	1.6802167546984297	-0.329824
TAATCCAATTA	-0.306727	-0.0951621	0.9085256019754728	0.1015887370319133
TAATGTAATTA	-0.292599	0.0466498	1.0399447752222668	-0.0410361
TAATAAAATTA	-0.0537951	-0.00949088	0.9719658054472768	-0.0377819
TAATGCAATTA	-0.338297	-0.450979	1.2162168371465365	-0.0741686
TAATTGGATTA	-0.121104	-0.301968	1.2740825823132524	-0.0367398
TAATTTCATTA	-0.526551	-0.0627345	1.0395981822624485	-0.104737
TAATTATATTA	-0.620304	-0.1451	0.9874158201928768	-0.0735765
TAATTTAATTA	-0.580438	0.0960771	0.7172608249739846	0.064879
TAATACAATTA	-0.660759	-0.552744	0.8182829214835753	-0.381964
TAATATTATTA	-0.536145	-0.683356	0.6858157069624591	-0.346333
TAATTTGATTA	-0.735611	-0.291015	0.8962910660752159	-0.340452
TAATTTTATTA	-0.738419	-0.227834	0.7521688575510039	-0.309255
TAATTCAATTA	-0.626141	-0.354994	0.7463222489203503	-0.288104
TAATTCTATTA	-0.478761	-0.330945	0.8884996464133424	-0.306135
TAATAATATTA	-0.612477	-0.367317	0.9558637955411048	-0.391111
TAATCTAATTA	-0.421873	-0.36622	1.075335762739925	-0.42784
TAATTGTATTA	-0.644438	-0.390202	1.220567056806886	-0.370326
TAATTGAATTA	-0.756136	-0.469923	1.1180856743356242	-0.451871
TAATACTATTA	-0.0776759	-0.566658	0.917711	0.3556732840378585
TAATATGATTA	-0.10592	-0.416019	0.7710394171786963	0.3211945571309253
TAATAGTATTA	-0.127616	-0.860288	0.9969324557197043	0.0909376
TAATAGAATTA	-0.961769	-0.820924	0.6955383173315735	-0.724652
TAATATAATTA	-1.07466	-0.617617	0.2569718662936968	-0.620736
TAATCAGATTA	0.6934106162267695	-0.214313	1.6270445688879729	0.971344
TAATGCTATTA	0.6506984859609666	-0.164403	1.4768276992614011	0.9977144063031992
TAATCCTATTA	0.6292767070291634	-0.0139669	1.563964952111244	1.1224756819197133
TAATCCGATTA	0.743429	-0.0902614	1.3018836009663108	1.039104888835505
TAATCACATTA	0.7956797374580644	0.2305414776560692	1.692468727481146	0.8970792513546815
TAATCGTATTA	0.7251127926670181	-0.119031	1.9012534737531088	0.9137162587905636
TAATACCATTA	0.4169925917330769	-0.0616492	1.8632252929030184	0.655744
TAATGTTATTA	0.427417	0.0642964	1.4128574014202002	0.6234499170494135
TAATAACATTA	0.3993033548621308	0.0150226	1.5195426880249214	0.5764257076813326
TAATCTCATTA	0.4085514832275493	-0.115538	1.5198072677878025	0.5567173197421716
TAATGTCATTA	0.4584839029143455	0.0539839	1.4195984292013484	0.4046834239674457
TAATCGGATTA	0.5260146505487933	0.010242	1.3492727235030393	0.7008598889619777
TAATGTGATTA	0.6891829310455496	0.0499776	1.439264748560623	0.742847
TAATCTTATTA	0.5038836744688515	-0.17213	1.6539373106072814	0.8749728483304485
TAATAGGATTA	0.5372773029809317	-0.264956	1.4298446981404418	0.8865866191156204
TAATAGCATTA	0.5575919408220766	-0.365865	1.6689873566128886	0.7234457392189788
TAATACGATTA	0.1842837007998706	-0.256655	1.579028473614727	0.8114205118475395
TAATCCCATTA	0.402266	0.2490161675550586	2.0343213675469203	0.6252761227643358
TAATGGCATTA	0.2872297476830471	0.123907	2.1112107377979727	0.397392
TAATGCCATTA	0.4270160655361338	0.1741220540402045	1.816081932527528	0.5112036902032575
TAATGGTATTA	0.2761876796287892	0.1737770171432888	1.8544627456967533	0.4438844380775408
TAATTCCATTA	0.2646586153551131	0.3101502309021931	1.7385882556382917	0.4320917381259607
TAATGGGATTA	0.6131210863994963	0.0501289	1.8827897529028044	0.3756756018929015
TAATGACATTA	0.5593085783470083	0.2954217550186208	1.705421271491134	0.4926848635506595
TAATCGCATTA	1.1389085911542678	0.1003925858557906	1.8278343852979464	1.3818866856801266
TAATGAGATTA	1.0481328834772723	0.1562505688871512	1.852769163450102	1.253489367693442
TAATAAGATTA	1.073071452080253	0.2383328476524541	1.7468040111228071	1.3815674376945564
TAATGCGATTA	0.9360702050550864	0.2698153921299671	1.8906242058084308	1.370180914763088

## Sheet: Supplemental Table S4
Supplemental Table S4. PWM models of de novo found motifs under differential ATAC-seq peaks
Note: For easy access, a formatted MEME file can be found at the GitHub repository for this publication.
MEME version 5.5.2
ALPHABET "DNA" DNA-LIKE
A "Adenine" CC0000 ~ T "Thymine" 008000
C "Cytosine" 0000CC ~ G "Guanine" FFB300
N "Any base" = ACGT
X = ACGT
. = ACGT
V "Not T" = ACG
H "Not G" = ACT
D "Not C" = AGT
B "Not A" = CGT
M "Amino" = AC
R "Purine" = AG
W "Weak" = AT
S "Strong" = CG
Y "Pyrimidine" = CT
K "Keto" = GT
U = T
END ALPHABET
strands: + -
Background letter frequencies:
A 0.265 C 0.235 G 0.235 T 0.265
MOTIF Ehet_atacGain.STREME-1
letter-probability matrix: alength= 4 w= 7 nsites= 424 P= 4.3e-005 E= 6.5e-004
0.157070 0.010635 0.797450 0.034845
0.092302 0.001158 0.883783 0.022757
0.133214 0.017446 0.817825 0.031514
0.993215 0.000231 0.000291 0.006264
0.001477 0.000231 0.000231 0.998061
0.028862 0.000231 0.000231 0.970677
0.997716 0.001785 0.000231 0.000269
MOTIF Ehet_atacGain.STREME-4
letter-probability matrix: alength= 4 w= 8 nsites= 427 P= 1.9e-003 E= 2.9e-002
0.209100 0.545412 0.044011 0.201478
0.053267 0.000330 0.000330 0.946072
0.952208 0.000330 0.047077 0.000384
0.998955 0.000330 0.000330 0.000384
0.000384 0.000330 0.837034 0.162252
0.094999 0.904287 0.000330 0.000384
0.000384 0.998901 0.000330 0.000384
0.274719 0.103276 0.305520 0.316485
MOTIF Ehom_atacGain.STREME-1
letter-probability matrix: alength= 4 w= 8 nsites= 1295 P= 1.6e-016 E= 3.3e-015
0.272642 0.027851 0.616847 0.082660
0.106588 0.001852 0.885011 0.006549
0.049986 0.008031 0.918043 0.023940
0.995112 0.000069 0.000069 0.004750
0.000078 0.000069 0.000069 0.999784
0.002101 0.000069 0.000069 0.997761
0.945471 0.000069 0.000069 0.054391
0.529487 0.117902 0.234562 0.118048
MOTIF Ehom_atacGain.STREME-3
letter-probability matrix: alength= 4 w= 10 nsites= 818 P= 8.2e-008 E= 1.7e-006
0.121380 0.239807 0.463755 0.175058
0.084944 0.666704 0.080291 0.168061
0.053626 0.000072 0.002191 0.944111
0.947590 0.000072 0.000072 0.052266
0.999775 0.000072 0.000072 0.000081
0.000081 0.000072 0.999766 0.000081
0.078877 0.846638 0.000072 0.074413
0.016348 0.864506 0.010487 0.108660
MOTIF Ehom_atacGain.MEME-7
letter-probability matrix: alength= 4 w= 15 nsites= 402 E= 7.1e-018
0.126866 0.350746 0.206468 0.315920
0.109453 0.390547 0.084577 0.415423
0.087065 0.452736 0.074627 0.385572
0.181592 0.276119 0.024876 0.517413
0.199005 0.310945 0.037313 0.452736
0.106965 0.460199 0.099502 0.333333
0.022388 0.335821 0.064677 0.577114
0.034826 0.000000 0.000000 0.965174
1.000000 0.000000 0.000000 0.000000
1.000000 0.000000 0.000000 0.000000
0.000000 0.000000 0.000000 1.000000
0.014925 0.863184 0.034826 0.087065
0.000000 0.828358 0.000000 0.171642
0.009950 0.597015 0.000000 0.393035
0.014925 0.375622 0.029851 0.579602
MOTIF Ehom_atacLost.MEME-5
letter-probability matrix: alength= 4 w= 11 nsites= 221 E= 3.5e-022
0.194570 0.153846 0.000000 0.651584
0.669683 0.018100 0.203620 0.108597
1.000000 0.000000 0.000000 0.000000
0.027149 0.000000 0.416290 0.556561
0.000000 1.000000 0.000000 0.000000
0.058824 0.497738 0.022624 0.420814
0.058824 0.131222 0.325792 0.484163
0.402715 0.597285 0.000000 0.000000
0.000000 0.000000 0.000000 1.000000
0.013575 0.000000 0.000000 0.986425
0.968326 0.000000 0.000000 0.031674
MOTIF Ehom_atacLost.STREME-1
letter-probability matrix: alength= 4 w= 11 nsites= 209 P= 2.6e-006 E= 2.9e-005
0.644995 0.030610 0.217570 0.106824
0.999353 0.000209 0.000209 0.000229
0.024542 0.020951 0.393205 0.561302
0.000229 0.956760 0.042782 0.000229
0.000229 0.680640 0.000209 0.318922
0.053343 0.000209 0.425355 0.521094
0.403073 0.596489 0.000209 0.000229
0.000229 0.000209 0.000209 0.999353
0.000229 0.000209 0.000209 0.999353
0.940564 0.000209 0.000209 0.059018
MOTIF Khet_atacGain.MEME-3
letter-probability matrix: alength= 4 w= 11 nsites= 669 E= 2.3e-099
0.116592 0.026906 0.000000 0.856502
0.919283 0.000000 0.038864 0.041854
1.000000 0.000000 0.000000 0.000000
0.000000 0.031390 0.041854 0.926756
0.082212 0.408072 0.420030 0.089686
0.152466 0.334828 0.000000 0.512706
0.391629 0.197309 0.007474 0.403587
0.823617 0.044843 0.000000 0.131540
0.000000 0.000000 0.000000 1.000000
0.001495 0.000000 0.000000 0.998505
0.949178 0.000000 0.000000 0.050822
MOTIF Khet_atacGain.STREME-1
letter-probability matrix: alength= 4 w= 14 nsites= 619 P= 3.2e-017 E= 4.8e-016
0.082388 0.019565 0.010698 0.887349
0.951931 0.000057 0.021339 0.026672
0.992721 0.001830 0.001830 0.003618
0.012485 0.035528 0.030205 0.921781
0.153345 0.370745 0.384653 0.091257
0.000071 0.318273 0.000057 0.681599
0.361903 0.239503 0.067154 0.331440
0.827776 0.028432 0.026662 0.117130
0.003618 0.000057 0.000057 0.996268
0.016032 0.000057 0.000057 0.983854
0.891626 0.012471 0.024889 0.071014
0.230657 0.152590 0.287820 0.328932
0.306614 0.299813 0.180970 0.212603
0.270396 0.170315 0.191303 0.367986
MOTIF Khet_atacLost.STREME-2
letter-probability matrix: alength= 4 w= 8 nsites= 398 P= 2.8e-004 E= 4.2e-003
0.152590 0.000189 0.847015 0.000206
0.104911 0.000189 0.854416 0.040484
0.960367 0.000189 0.000189 0.039254
0.000206 0.000189 0.000189 0.999415
0.005462 0.000189 0.000189 0.994160
0.880808 0.000189 0.000189 0.118813
0.557265 0.201081 0.092637 0.149017
0.652262 0.035736 0.251327 0.060676
MOTIF Khom_atacGain.MEME-3
letter-probability matrix: alength= 4 w= 11 nsites= 1000 E= 4.7e-066
0.000000 0.000000 0.000000 1.000000
0.979000 0.000000 0.000000 0.021000
1.000000 0.000000 0.000000 0.000000
0.000000 0.010000 0.000000 0.990000
0.204000 0.238000 0.413000 0.145000
0.000000 0.044000 0.000000 0.956000
0.600000 0.301000 0.001000 0.098000
0.997000 0.000000 0.000000 0.003000
0.000000 0.000000 0.000000 1.000000
0.000000 0.000000 0.000000 1.000000
1.000000 0.000000 0.000000 0.000000
MOTIF Khom_atacGain.MEME-7
letter-probability matrix: alength= 4 w= 11 nsites= 1000 E= 1.7e-010
0.000000 0.000000 0.000000 1.000000
0.973000 0.000000 0.027000 0.000000
1.000000 0.000000 0.000000 0.000000
0.280000 0.000000 0.000000 0.720000
0.779000 0.014000 0.112000 0.095000
0.048000 0.000000 0.718000 0.234000
0.018000 0.278000 0.582000 0.122000
1.000000 0.000000 0.000000 0.000000
0.000000 0.000000 0.000000 1.000000
0.000000 0.000000 0.000000 1.000000
0.767000 0.000000 0.013000 0.220000
MOTIF Khom_atacGain.STREME-1
letter-probability matrix: alength= 4 w= 13 nsites= 3625 P= 3.2e-045 E= 1.3e-043
0.275048 0.231239 0.127165 0.366548
0.083464 0.014878 0.004854 0.896804
0.905830 0.000011 0.013022 0.081137
0.992281 0.003165 0.000506 0.004048
0.075942 0.028106 0.034756 0.861196
0.163808 0.181547 0.278676 0.375969
0.418770 0.081230 0.081230 0.418770
0.375969 0.278676 0.181547 0.163808
0.861196 0.034756 0.028106 0.075942
0.004048 0.000506 0.003165 0.992281
0.081137 0.013022 0.000011 0.905830
0.896804 0.004854 0.014878 0.083464
0.366548 0.127165 0.231239 0.275048
MOTIF Khom_atacGain.STREME-2
letter-probability matrix: alength= 4 w= 10 nsites= 3255 P= 3.8e-038 E= 1.5e-036
0.258596 0.055764 0.516748 0.168892
0.063219 0.453219 0.130073 0.353489
0.000024 0.000019 0.000019 0.999937
0.995862 0.004094 0.000019 0.000024
0.999937 0.000019 0.000019 0.000024
0.000024 0.000019 0.000019 0.999937
0.000024 0.000019 0.004094 0.995862
0.999937 0.000019 0.000019 0.000024
0.353489 0.130073 0.453219 0.063219
0.168892 0.516748 0.055764 0.258596
MOTIF Khom_atacGain.STREME-6
letter-probability matrix: alength= 4 w= 12 nsites= 1110 P= 2.2e-010 E= 8.9e-009
0.135733 0.063557 0.018576 0.782135
0.874306 0.000038 0.068636 0.057020
0.999875 0.000038 0.000038 0.000048
0.316473 0.081208 0.073986 0.528333
0.976040 0.000038 0.000038 0.023883
0.000048 0.000038 0.999865 0.000048
0.000048 0.173098 0.756321 0.070532
0.919734 0.069308 0.004898 0.006061
0.000048 0.007254 0.000038 0.992660
0.064066 0.071023 0.020010 0.844901
0.697040 0.037549 0.041504 0.223907
0.291873 0.176937 0.285641 0.245549
MOTIF Khom_atacGain.STREME-7
letter-probability matrix: alength= 4 w= 9 nsites= 1282 P= 3.7e-010 E= 1.5e-008
0.026588 0.912263 0.040171 0.020978
0.000118 0.999670 0.000094 0.000118
0.973352 0.000094 0.000349 0.026205
0.000118 0.019584 0.114244 0.866055
0.007039 0.969015 0.000094 0.023853
0.007139 0.000825 0.000367 0.991669
0.006224 0.091711 0.901947 0.000118
0.006168 0.285894 0.030015 0.677923
0.046942 0.727296 0.033741 0.192021
MOTIF Khom_atacLost.STREME-1
letter-probability matrix: alength= 4 w= 9 nsites= 1179 P= 3.9e-012 E= 1.1e-010
0.253811 0.114046 0.550022 0.082122
0.159066 0.058882 0.771024 0.011029
0.013193 0.000064 0.986673 0.000070
0.999802 0.000064 0.000064 0.000070
0.000070 0.000064 0.000064 0.999802
0.000070 0.000064 0.000064 0.999802
0.999802 0.000064 0.000064 0.000070
0.397539 0.197868 0.163007 0.241587
0.573708 0.160059 0.235765 0.030468
MOTIF Khom_atacLost.STREME-7
letter-probability matrix: alength= 4 w= 13 nsites= 671 P= 3.1e-005 E= 9.0e-004
0.184346 0.501785 0.147996 0.165873
0.160580 0.037174 0.024632 0.777613
0.800355 0.016278 0.066369 0.116999
0.955718 0.002646 0.018522 0.023114
0.051779 0.017244 0.803651 0.127326
0.079169 0.827291 0.056357 0.037183
0.401443 0.098557 0.098557 0.401443
0.037183 0.056357 0.827291 0.079169
0.127326 0.803651 0.017244 0.051779
0.023114 0.018522 0.002646 0.955718
0.116999 0.066369 0.016278 0.800355
0.777613 0.024632 0.037174 0.160580
0.165873 0.147996 0.501785 0.184346

## Sheet: Supplemental Table S5
Supplemental Table S5. PWM models used for FIMO motif searching
Note: For easy access, a formatted MEME file can be found at the GitHub repository for this publication.
MEME version 5.5.2
ALPHABET "DNA" DNA-LIKE
A "Adenine" CC0000 ~ T "Thymine" 008000
C "Cytosine" 0000CC ~ G "Guanine" FFB300
N "Any base" = ACGT
X = ACGT
. = ACGT
V "Not T" = ACG
H "Not G" = ACT
D "Not C" = AGT
B "Not A" = CGT
M "Amino" = AC
R "Purine" = AG
W "Weak" = AT
S "Strong" = CG
Y "Pyrimidine" = CT
K "Keto" = GT
U = T
END ALPHABET
strands: + -
Background letter frequencies:
A 0.250 C 0.250 G 0.250 T 0.250
MOTIF CRX_Corbo
letter-probability matrix: alength= 4 w= 8 nsites= 32 E= 0.0e+000
0.209900 0.265000 0.160400 0.364700
0.138500 0.021700 0.013100 0.826700
0.802500 0.010300 0.129500 0.057700
0.984500 0.003900 0.005500 0.006000
0.029200 0.020300 0.167100 0.783400
0.109300 0.748200 0.039700 0.102900
0.071200 0.605300 0.032100 0.291300
0.179800 0.319000 0.263800 0.237400
Used to identify monomeric WT CRX (K50 HD) motifs, and for calculating relative binding affinity presented in Figure S3
MOTIF RAX2.MA0717.1
letter-probability matrix: alength= 4 w= 8 nsites= 38859 E= 0
0.137265 0.406856 0.181399 0.274480
0.080669 0.445404 0.038271 0.435655
0.795806 0.062665 0.091950 0.049579
0.921508 0.036116 0.017951 0.024425
0.006751 0.018453 0.003126 0.971670
0.045361 0.088587 0.052604 0.813447
0.842548 0.057326 0.007805 0.092320
0.345102 0.192661 0.318108 0.144129
Used to identify monomeric Q50 HD motifs
MOTIF E80A_atacLost.MEME-19
letter-probability matrix: alength= 4 w= 11
0.076305 0.000000 0.000000 0.923695
1.000000 0.000000 0.000000 0.000000
1.000000 0.000000 0.000000 0.000000
0.000000 0.000000 0.598394 0.401606
0.514056 0.329317 0.076305 0.080321
0.389558 0.004016 0.570281 0.036145
0.012048 0.024096 0.963855 0.000000
0.574297 0.365462 0.024096 0.036145
0.000000 0.000000 0.000000 1.000000
0.092369 0.168675 0.028112 0.710843
0.674699 0.012048 0.124498 0.188755
Used to identify dimeric K50 HD motifs
MOTIF K88N_chipGain.MEME.1
letter-probability matrix: alength= 4 w= 11
0.094556 0.008596 0.008596 0.888252
0.985673 0.000000 0.014327 0.000000
0.997135 0.000000 0.000000 0.002865
0.000000 0.000000 0.022923 0.977077
0.120344 0.146132 0.659026 0.074499
0.166189 0.355301 0.011461 0.467049
0.435530 0.126074 0.020057 0.418338
0.948424 0.014327 0.031519 0.005731
0.000000 0.000000 0.000000 1.000000
0.008596 0.000000 0.000000 0.991404
0.948424 0.000000 0.000000 0.051576
Used to identify dimeric Q50 HD motifs

## Sheet: Supplemental Table S6
Supplemental Table S6. HD motif annotation of CREs associated with CRX-DAGs
peak.id	seqnames	start	end	gene	k50_mono	k50_di	q50_mono	q50_di	k50_group	q50_group		Note: grouping annotation
peak.1	chr1	4357578	4357978	Rp1	1	1	0	1	3	3		0: no motif called
peak.2	chr1	4358409	4358809	Rp1	1	0	0	0	3	3		1: monomeric motif only
peak.3	chr1	4360133	4360533	Rp1	1	0	1	1	3	3		2: dimeric motif only
peak.4	chr1	4383639	4384039	Rp1	1	0	0	0	3	3		3: non-overlapping monomeric and dimeric motif called
peak.7	chr1	4904619	4905019	Rgs20	1	1	1	0	3	1
peak.8	chr1	4908211	4908611	Rgs20	1	0	1	0	3	1		The peak.id column is the unique identifier of CRX ChIP peaks associated with the gene
peak.9	chr1	4970580	4970980	Rgs20	1	1	1	0	3	1
peak.10	chr1	5070152	5070552	Rgs20	0	0	0	0	3	1
peak.15	chr1	9982079	9982479	Ppp1r42	1	1	1	0	3	1
peak.16	chr1	10008981	10009381	Ppp1r42	1	1	0	0	3	1
peak.61	chr1	37214204	37214604	Cnga3	0	1	1	1	3	3
peak.62	chr1	37218918	37219318	Cnga3	1	1	0	0	3	3
peak.119	chr1	59161469	59161869	Mpp4	1	0	0	0	3	2
peak.120	chr1	59163483	59163883	Mpp4	1	1	0	1	3	2
peak.324	chr1	130712302	130712702	Pfkfb2	1	1	0	0	3	0
peak.325	chr1	130715751	130716151	Pfkfb2	1	0	0	0	3	0
peak.384	chr1	136128978	136129378	Kif21b	1	0	0	0	1	2
peak.385	chr1	136132707	136133107	Kif21b	1	0	0	0	1	2
peak.386	chr1	136140183	136140583	Kif21b	0	0	0	0	1	2
peak.387	chr1	136193564	136193964	Kif21b	1	0	0	1	1	2
peak.519	chr1	172488839	172489239	Igsf9	1	1	0	0	3	0
peak.763	chr10	60109514	60109914	Chst3	1	0	0	0	3	3
peak.764	chr10	60189228	60189628	Chst3	1	1	1	1	3	3
peak.765	chr10	60261513	60261913	Chst3	1	1	0	1	3	3
peak.868	chr10	80045776	80046176	Gpx4	1	0	1	0	3	3
peak.869	chr10	80050991	80051391	Gpx4	1	0	0	1	3	3
peak.870	chr10	80051976	80052376	Gpx4	1	1	0	0	3	3
peak.871	chr10	80053319	80053719	Gpx4	1	0	0	0	3	3
peak.906	chr10	84917014	84917414	Ric8b	0	0	0	0	1	0
peak.907	chr10	84918293	84918693	Ric8b	1	0	0	0	1	0
peak.1112	chr11	4121248	4121648	Sec14l2	1	0	0	0	1	0
peak.1113	chr11	4122722	4123122	Sec14l2	1	0	0	0	1	0
peak.1175	chr11	23007510	23007910	Fam161a	1	0	1	0	3	3
peak.1176	chr11	23009441	23009841	Fam161a	0	1	0	0	3	3
peak.1177	chr11	23010751	23011151	Fam161a	1	0	0	0	3	3
peak.1178	chr11	23012345	23012745	Fam161a	1	0	1	0	3	3
peak.1179	chr11	23067888	23068288	Fam161a	1	0	1	1	3	3
peak.1286	chr11	57798921	57799321	Sap30l	1	0	0	0	3	1
peak.1287	chr11	57802593	57802993	Sap30l	1	1	1	0	3	1
peak.1343	chr11	65877345	65877745	Dnah9	1	1	0	1	3	2
peak.1344	chr11	66157133	66157533	Dnah9	1	1	0	0	3	2
peak.1350	chr11	67695108	67695508	Rcvrn	1	0	0	0	1	0
peak.1360	chr11	68974090	68974490	Rangrf	1	0	0	0	1	0
peak.1367	chr11	69236863	69237263	Gucy2e	1	1	0	0	3	0
peak.1383	chr11	69693558	69693958	Tnfsf12	1	0	1	0	1	1
peak.1677	chr11	101614079	101614479	Rdm1	1	1	1	0	3	1
peak.1678	chr11	101624976	101625376	Rdm1	0	1	0	0	3	1
peak.1679	chr11	101627515	101627915	Rdm1	1	0	1	0	3	1
peak.1680	chr11	101658263	101658663	Arl4d	0	0	0	1	3	3
peak.1681	chr11	101663321	101663721	Arl4d	1	1	0	0	3	3
peak.1682	chr11	101668107	101668507	Arl4d	1	0	0	0	3	3
peak.1683	chr11	101669485	101669885	Arl4d	1	0	0	0	3	3
peak.1684	chr11	101718337	101718737	Arl4d	1	0	1	0	3	3
peak.1715	chr11	106329738	106330138	Scn4a	0	0	0	1	1	2
peak.1716	chr11	106344916	106345316	Scn4a	1	0	0	0	1	2
peak.1729	chr11	106980886	106981286	Kpna2	1	0	0	0	1	0
peak.1730	chr11	106984314	106984714	Kpna2	1	0	0	0	1	0
peak.1731	chr11	106998237	106998637	Kpna2	1	0	0	0	1	0
peak.1732	chr11	106999363	106999763	Kpna2	0	0	0	0	1	0
peak.1854	chr11	120452269	120452669	Pde6g	1	1	0	1	3	2
peak.1935	chr12	30369735	30370135	Sntg2	1	0	0	0	1	0
peak.2079	chr12	76546658	76547058	Plekhg3	1	1	0	0	3	3
peak.2080	chr12	76547895	76548295	Plekhg3	1	0	0	0	3	3
peak.2081	chr12	76557115	76557515	Plekhg3	1	0	1	0	3	3
peak.2082	chr12	76623404	76623804	Plekhg3	0	1	0	1	3	3
peak.2095	chr12	79100918	79101318	Arg2	1	0	0	0	1	0
peak.2096	chr12	79130668	79131068	Arg2	1	0	0	0	1	0
peak.2098	chr12	79208667	79209067	Rdh12	1	0	0	0	3	3
peak.2099	chr12	79216098	79216498	Rdh12	1	1	1	1	3	3
peak.2100	chr12	79242888	79243288	Rdh12	0	1	0	0	3	3
peak.2101	chr12	79275776	79276176	Rdh12	1	0	0	0	3	3
peak.2162	chr12	86250228	86250628	Esrrb	1	0	0	0	3	3
peak.2163	chr12	86262122	86262522	Esrrb	1	0	1	1	3	3
peak.2164	chr12	86279908	86280308	Esrrb	1	1	1	1	3	3
peak.2165	chr12	86406521	86406921	Esrrb	1	0	0	0	3	3
peak.2166	chr12	86421357	86421757	Esrrb	0	0	0	0	3	3
peak.2167	chr12	86427307	86427707	Esrrb	1	1	0	1	3	3
peak.2168	chr12	86431676	86432076	Esrrb	1	0	0	1	3	3
peak.2169	chr12	86453682	86454082	Esrrb	1	0	0	0	3	3
peak.2170	chr12	86456265	86456665	Esrrb	1	1	1	1	3	3
peak.2171	chr12	86501130	86501530	Esrrb	1	1	0	1	3	3
peak.2172	chr12	86507687	86508087	Esrrb	1	0	1	0	3	3
peak.2173	chr12	86516770	86517170	Esrrb	1	1	1	0	3	3
peak.2174	chr12	86553370	86553770	Esrrb	1	0	1	0	3	3
peak.2175	chr12	86647737	86648137	Esrrb	0	1	0	0	3	3
peak.2210	chr12	98734995	98735395	Ptpn21	1	1	0	1	3	2
peak.2504	chr13	49248479	49248879	Susd3	1	0	0	0	3	0
peak.2505	chr13	49250674	49251074	Susd3	1	1	0	0	3	0
peak.2569	chr13	58037563	58037963	Klhl3	1	0	1	0	3	3
peak.2570	chr13	58040071	58040471	Klhl3	0	0	0	0	3	3
peak.2571	chr13	58090810	58091210	Klhl3	1	1	0	1	3	3
peak.2775	chr13	119755084	119755484	Nim1k	1	0	0	0	1	0
peak.2937	chr14	52110674	52111074	Rpgrip1	1	1	0	0	3	0
peak.2959	chr14	55524824	55525224	Nrl	0	0	0	0	0	0
peak.2960	chr14	55526657	55527057	Nrl	0	0	0	0	0	0
peak.3194	chr15	9070966	9071366	Nadk2	1	1	1	0	3	3
peak.3195	chr15	9073891	9074291	Nadk2	1	0	1	0	3	3
peak.3196	chr15	9080292	9080692	Nadk2	1	0	0	0	3	3
peak.3197	chr15	9088279	9088679	Nadk2	0	0	1	1	3	3
peak.3198	chr15	9091974	9092374	Nadk2	1	0	0	0	3	3
peak.3199	chr15	9096885	9097285	Nadk2	1	1	1	1	3	3
peak.3200	chr15	9110812	9111212	Nadk2	1	1	1	1	3	3
peak.3329	chr15	67119476	67119876	St3gal1	0	1	0	0	3	3
peak.3330	chr15	67346484	67346884	St3gal1	0	0	1	0	3	3
peak.3331	chr15	67423984	67424384	St3gal1	1	0	0	0	3	3
peak.3332	chr15	68102504	68102904	St3gal1	1	0	0	1	3	3
peak.3358	chr15	75704043	75704443	Rhpn1	0	0	1	0	0	1
peak.3420	chr15	81855309	81855709	Tob2	1	0	0	1	1	3
peak.3421	chr15	81856870	81857270	Tob2	1	0	0	0	1	3
peak.3422	chr15	81858349	81858749	Tob2	0	0	0	0	1	3
peak.3423	chr15	81859886	81860286	Tob2	0	0	1	0	1	3
peak.3484	chr15	89147069	89147469	Mapk11	1	0	1	0	1	1
peak.3534	chr15	98606811	98607211	Adcy6	1	0	0	0	1	0
peak.3536	chr15	98894418	98894818	Dhh	0	1	1	1	2	3
peak.3537	chr15	98917929	98918329	Lmbr1l	1	0	0	0	1	0
peak.3639	chr16	19883780	19884180	A930003A15Rik	1	0	0	1	1	2
peak.3717	chr16	35413062	35413462	Pdia5	1	1	0	0	3	1
peak.3718	chr16	35459572	35459972	Pdia5	1	0	1	0	3	1
peak.3719	chr16	35473028	35473428	Pdia5	1	0	0	0	3	1
peak.3857	chr16	92295208	92295608	Kcne2	0	1	0	1	2	2
peak.3877	chr16	96126582	96126982	Hmgn1	0	1	0	0	2	0
peak.3943	chr17	23739397	23739797	Paqr4	1	0	0	0	1	0
peak.3998	chr17	28313120	28313520	Fance	1	1	0	1	3	2
peak.4051	chr17	34952534	34952934	Hspa1b	1	0	0	0	1	0
peak.4120	chr17	47399101	47399501	Guca1a	0	1	0	0	3	0
peak.4121	chr17	47400452	47400852	Guca1a	1	0	0	0	3	0
peak.4243	chr17	80727178	80727578	Map4k3	0	1	0	0	3	3
peak.4244	chr17	80729000	80729400	Map4k3	1	0	1	0	3	3
peak.4245	chr17	80739404	80739804	Map4k3	1	0	1	0	3	3
peak.4246	chr17	80832454	80832854	Map4k3	1	1	0	1	3	3
peak.4247	chr17	80878033	80878433	Map4k3	1	1	1	1	3	3
peak.4248	chr17	80885688	80886088	Map4k3	1	1	1	1	3	3
peak.4249	chr17	80892542	80892942	Map4k3	1	0	1	1	3	3
peak.4307	chr18	4993701	4994101	Svil	1	1	1	0	3	1
peak.4319	chr18	10620956	10621356	Abhd3	1	1	0	1	3	3
peak.4320	chr18	10685030	10685430	Abhd3	1	1	1	1	3	3
peak.4321	chr18	10716984	10717384	Abhd3	1	0	1	0	3	3
peak.4483	chr18	56605119	56605519	Lmnb1	0	1	1	1	3	3
peak.4484	chr18	56651925	56652325	Lmnb1	1	0	0	0	3	3
peak.4485	chr18	56658528	56658928	Lmnb1	1	0	0	0	3	3
peak.4486	chr18	56670286	56670686	Lmnb1	1	1	0	0	3	3
peak.4487	chr18	56677395	56677795	Lmnb1	1	1	0	1	3	3
peak.4488	chr18	56711106	56711506	Lmnb1	1	1	0	1	3	3
peak.4546	chr18	65946157	65946557	Cplx4	1	1	1	1	3	3
peak.4547	chr18	65959040	65959440	Cplx4	1	0	1	0	3	3
peak.4548	chr18	65961004	65961404	Cplx4	1	1	1	1	3	3
peak.4549	chr18	65970053	65970453	Cplx4	1	0	0	0	3	3
peak.4550	chr18	65979890	65980290	Cplx4	0	1	1	1	3	3
peak.4599	chr18	77047193	77047593	Katnal2	1	0	1	0	1	1
peak.4660	chr19	4139463	4139863	Cabp4	1	1	0	0	3	0
peak.4670	chr19	5023567	5023967	Slc29a2	0	1	0	1	2	2
peak.4799	chr19	27218885	27219285	Kcnv2	0	0	1	0	3	3
peak.4800	chr19	27225456	27225856	Kcnv2	1	1	1	0	3	3
peak.4801	chr19	27276665	27277065	Kcnv2	1	0	1	1	3	3
peak.4802	chr19	27322282	27322682	Kcnv2	1	0	1	0	3	3
peak.4803	chr19	27348043	27348443	Kcnv2	1	1	0	0	3	3
peak.4856	chr19	38132538	38132938	Pde6c	1	1	0	0	3	0
peak.4919	chr19	46532196	46532596	Arl3	1	0	0	0	3	2
peak.4920	chr19	46563122	46563522	Arl3	1	1	0	1	3	2
peak.4921	chr19	46569104	46569504	Arl3	1	0	0	0	3	2
peak.5005	chr2	5985761	5986161	Proser2	1	1	1	1	3	3
peak.5008	chr2	6352998	6353398	Usp6nl	1	1	1	1	3	3
peak.5062	chr2	26290067	26290467	Ccdc187	1	1	0	1	3	2
peak.5063	chr2	26300081	26300481	Ccdc187	1	0	0	0	3	2
peak.5086	chr2	30092592	30092992	Zdhhc12	1	0	0	0	1	0
peak.5135	chr2	34870876	34871276	Cutal	0	1	0	0	3	0
peak.5136	chr2	34875111	34875511	Cutal	1	1	0	0	3	0
peak.5201	chr2	60553338	60553738	Pla2r1	1	0	0	0	1	0
peak.5212	chr2	69647017	69647417	Bbs5	0	0	0	0	3	0
peak.5213	chr2	69649688	69650088	Bbs5	1	1	0	0	3	0
peak.5398	chr2	119112525	119112925	Rad51	0	0	0	0	0	0
peak.5411	chr2	121008275	121008675	Ccndbp1	0	1	0	0	2	0
peak.5413	chr2	121359227	121359627	Ckmt1	1	0	0	0	1	0
peak.5446	chr2	129800018	129800418	Stk35	1	1	1	0	3	1
peak.5447	chr2	129805506	129805906	Stk35	1	1	0	0	3	1
peak.5448	chr2	129826559	129826959	Stk35	1	1	0	0	3	1
peak.5487	chr2	140202482	140202882	Ndufaf5	1	0	0	0	3	3
peak.5488	chr2	140364986	140365386	Ndufaf5	1	1	1	1	3	3
peak.5565	chr2	155956063	155956463	Cep250	0	0	0	0	0	0
peak.5636	chr2	167112201	167112601	Kcnb1	1	0	1	1	3	3
peak.5637	chr2	167142027	167142427	Kcnb1	1	0	0	0	3	3
peak.5638	chr2	167181069	167181469	Kcnb1	1	1	0	0	3	3
peak.5639	chr2	167186593	167186993	Kcnb1	1	0	0	0	3	3
peak.5680	chr2	180457256	180457656	Slco4a1	0	1	0	0	3	0
peak.5681	chr2	180460741	180461141	Slco4a1	1	1	0	0	3	0
peak.5818	chr3	51396326	51396726	Mgarp	0	0	0	0	0	0
peak.5905	chr3	85656726	85657126	Fam160a1	1	0	0	0	3	3
peak.5906	chr3	85673823	85674223	Fam160a1	1	1	1	0	3	3
peak.5907	chr3	85678797	85679197	Fam160a1	1	0	1	0	3	3
peak.5908	chr3	85681162	85681562	Fam160a1	1	1	0	1	3	3
peak.5909	chr3	85885881	85886281	Fam160a1	0	1	1	1	3	3
peak.6006	chr3	104637722	104638122	Slc16a1	1	0	0	0	3	3
peak.6007	chr3	104640441	104640841	Slc16a1	1	1	1	1	3	3
peak.6008	chr3	104667520	104667920	Slc16a1	1	0	1	1	3	3
peak.6009	chr3	104674542	104674942	Slc16a1	1	0	0	0	3	3
peak.6010	chr3	104694012	104694412	Slc16a1	1	1	1	1	3	3
peak.6011	chr3	104773303	104773703	Slc16a1	1	0	0	0	3	3
peak.6031	chr3	108092721	108093121	Gnat2	1	1	0	0	3	0
peak.6055	chr3	122044196	122044596	Abca4	1	0	1	0	3	3
peak.6056	chr3	122053561	122053961	Abca4	0	0	0	1	3	3
peak.6057	chr3	122134395	122134795	Abca4	1	1	0	0	3	3
peak.6058	chr3	122202477	122202877	Abca4	1	0	0	0	3	3
peak.6091	chr3	129803916	129804316	Lrit3	1	0	0	0	1	0
peak.6092	chr3	129805843	129806243	Lrit3	1	0	0	0	1	0
peak.6165	chr3	152981983	152982383	St6galnac5	1	0	0	0	1	0
peak.6261	chr4	41569457	41569857	Dnaic1	1	0	0	0	3	2
peak.6262	chr4	41619230	41619630	Dnaic1	1	0	0	0	3	2
peak.6263	chr4	41634621	41635021	Dnaic1	0	1	0	1	3	2
peak.6291	chr4	45203668	45204068	Frmpd1	1	1	1	0	3	1
peak.6292	chr4	45263965	45264365	Frmpd1	1	0	0	0	3	1
peak.6297	chr4	45967461	45967861	Tdrd7	1	0	0	1	1	3
peak.6298	chr4	45973492	45973892	Tdrd7	1	0	0	0	1	3
peak.6299	chr4	46006195	46006595	Tdrd7	0	0	1	0	1	3
peak.6300	chr4	46026947	46027347	Tdrd7	1	0	0	1	1	3
peak.6508	chr4	117871194	117871594	Ccdc24	1	0	0	0	1	0
peak.6509	chr4	117872671	117873071	Ccdc24	0	0	0	0	1	0
peak.6594	chr4	131010360	131010760	Ptpru	1	0	0	0	3	3
peak.6595	chr4	131060676	131061076	Ptpru	1	0	0	0	3	3
peak.6596	chr4	131161316	131161716	Ptpru	0	1	1	1	3	3
peak.6597	chr4	131233879	131234279	Ptpru	1	0	0	0	3	3
peak.6598	chr4	131236474	131236874	Ptpru	1	1	0	0	3	3
peak.6599	chr4	131752811	131753211	Ptpru	1	0	0	0	3	3
peak.6600	chr4	131756065	131756465	Ptpru	1	0	1	0	3	3
peak.6666	chr4	137766348	137766748	Alpl	1	0	0	0	1	0
peak.6695	chr4	140948409	140948809	Padi2	0	0	1	0	0	1
peak.6697	chr4	141053513	141053913	Crocc	1	0	0	0	1	0
peak.6698	chr4	141060745	141061145	Crocc	0	0	0	0	1	0
peak.6713	chr4	144891691	144892091	Dhrs3	1	1	0	1	3	3
peak.6714	chr4	144894496	144894896	Dhrs3	1	0	0	0	3	3
peak.6715	chr4	145008420	145008820	Dhrs3	1	1	1	1	3	3
peak.6716	chr4	145023573	145023973	Dhrs3	1	0	0	0	3	3
peak.6784	chr4	152299726	152300126	Icmt	1	1	0	0	3	2
peak.6785	chr4	152313293	152313693	Icmt	0	0	0	0	3	2
peak.6786	chr4	152316193	152316593	Icmt	1	0	0	1	3	2
peak.6810	chr4	155010909	155011309	Plch2	1	0	0	0	1	0
peak.6811	chr4	155012867	155013267	Plch2	1	0	0	0	1	0
peak.6814	chr4	155483880	155484280	Gnb1	1	1	1	0	3	3
peak.6815	chr4	155494882	155495282	Gnb1	0	1	0	1	3	3
peak.6816	chr4	155522301	155522701	Gnb1	1	0	1	0	3	3
peak.6817	chr4	155524085	155524485	Gnb1	0	0	0	0	3	3
peak.6818	chr4	155538097	155538497	Gnb1	1	0	1	0	3	3
peak.6825	chr4	156255265	156255665	Samd11	1	1	0	1	3	2
peak.6942	chr5	43807741	43808141	Bst1	1	0	1	1	3	3
peak.6943	chr5	43827374	43827774	Bst1	1	1	0	1	3	3
peak.7005	chr5	72608263	72608663	Cnga1	1	1	0	0	3	3
peak.7006	chr5	72632824	72633224	Cnga1	1	0	1	0	3	3
peak.7007	chr5	72642561	72642961	Cnga1	1	0	1	0	3	3
peak.7008	chr5	72643636	72644036	Cnga1	1	1	0	1	3	3
peak.7014	chr5	73212424	73212824	Fryl	0	1	0	0	3	1
peak.7015	chr5	73256407	73256807	Fryl	1	1	1	0	3	1
peak.7044	chr5	92138903	92139303	Ppef2	1	1	1	1	3	3
peak.7045	chr5	92256196	92256596	Ppef2	1	1	0	1	3	3
peak.7178	chr5	115652901	115653301	Bicdl1	0	0	1	0	3	1
peak.7179	chr5	115678750	115679150	Bicdl1	1	0	0	0	3	1
peak.7180	chr5	115686664	115687064	Bicdl1	1	1	0	0	3	1
peak.7181	chr5	115730499	115730899	Bicdl1	1	1	1	0	3	1
peak.7268	chr5	130186944	130187344	Rabgef1	1	0	0	0	1	0
peak.7269	chr5	130192371	130192771	Rabgef1	1	0	0	0	1	0
peak.7270	chr5	130196226	130196626	Rabgef1	1	0	0	0	1	0
peak.7419	chr6	3975716	3976116	Gngt1	0	1	1	1	3	3
peak.7420	chr6	3993754	3994154	Gngt1	1	1	0	1	3	3
peak.7467	chr6	29209873	29210273	Impdh1	1	0	0	0	3	0
peak.7468	chr6	29214198	29214598	Impdh1	1	0	0	0	3	0
peak.7469	chr6	29215164	29215564	Impdh1	1	1	0	0	3	0
peak.7551	chr6	49318981	49319381	Ccdc126	0	0	0	0	3	2
peak.7552	chr6	49319940	49320340	Ccdc126	1	1	0	1	3	2
peak.7553	chr6	49321300	49321700	Ccdc126	1	0	0	1	3	2
peak.7554	chr6	49324416	49324816	Ccdc126	1	1	0	1	3	2
peak.7589	chr6	55303087	55303487	Aqp1	1	0	0	0	1	0
peak.7607	chr6	67010509	67010909	Gadd45a	0	0	1	0	1	1
peak.7608	chr6	67036271	67036671	Gadd45a	1	0	0	0	1	1
peak.7609	chr6	67062290	67062690	Gadd45a	1	0	0	0	1	1
peak.7726	chr6	97352574	97352974	Frmd4b	1	0	0	0	3	3
peak.7727	chr6	97394659	97395059	Frmd4b	1	0	0	0	3	3
peak.7728	chr6	97484827	97485227	Frmd4b	1	1	1	1	3	3
peak.7729	chr6	97485917	97486317	Frmd4b	0	0	1	0	3	3
peak.7730	chr6	97500236	97500636	Frmd4b	1	1	1	0	3	3
peak.7761	chr6	115592405	115592805	Mkrn2os	1	0	1	1	1	3
peak.7768	chr6	115928771	115929171	Rho	1	0	0	0	3	1
peak.7769	chr6	115930180	115930580	Rho	1	1	0	0	3	1
peak.7770	chr6	115931623	115932023	Rho	1	1	0	0	3	1
peak.7771	chr6	115934103	115934503	Rho	1	1	1	0	3	1
peak.7772	chr6	115938259	115938659	Rho	1	1	1	0	3	1
peak.7823	chr6	125690165	125690565	Ano2	1	0	1	0	3	1
peak.7824	chr6	125693067	125693467	Ano2	1	1	0	0	3	1
peak.7825	chr6	125727675	125728075	Ano2	1	0	1	0	3	1
peak.7843	chr6	131416599	131416999	Ybx3	1	0	1	0	1	1
peak.7857	chr6	136949514	136949914	Pde6h	1	1	0	1	3	3
peak.7858	chr6	137135451	137135851	Pde6h	1	1	1	0	3	3
peak.8045	chr7	28692616	28693016	Fbxo27	1	0	0	0	1	0
peak.8046	chr7	28693576	28693976	Fbxo27	1	0	0	0	1	0
peak.8136	chr7	45164507	45164907	Slc17a7	1	1	1	1	3	3
peak.8315	chr7	98111339	98111739	Myo7a	1	0	0	0	1	0
peak.8449	chr7	120960148	120960548	Cdr2	1	0	1	1	3	3
peak.8450	chr7	120961574	120961974	Cdr2	1	1	0	1	3	3
peak.8497	chr7	127470785	127471185	Prr14	0	0	1	0	0	1
peak.8612	chr8	13181116	13181516	Grtp1	1	0	0	0	1	3
peak.8613	chr8	13188151	13188551	Grtp1	1	0	1	1	1	3
peak.8619	chr8	13404648	13405048	Grk1	1	1	0	1	3	3
peak.8620	chr8	13406072	13406472	Grk1	0	1	1	0	3	3
peak.8732	chr8	47604337	47604737	Ing2	1	0	0	0	3	3
peak.8733	chr8	47652359	47652759	Ing2	1	0	1	1	3	3
peak.8734	chr8	47654415	47654815	Ing2	1	0	0	0	3	3
peak.8735	chr8	47675825	47676225	Ing2	1	1	1	0	3	3
peak.8807	chr8	71566465	71566865	Nxnl1	0	1	0	0	2	0
peak.8808	chr8	71570058	71570458	Nxnl1	0	0	0	0	2	0
peak.8825	chr8	77011816	77012216	Arhgap10	1	0	1	0	3	1
peak.8826	chr8	77132673	77133073	Arhgap10	1	0	1	0	3	1
peak.8827	chr8	77267923	77268323	Arhgap10	1	0	0	0	3	1
peak.8828	chr8	77499670	77500070	Arhgap10	1	0	0	0	3	1
peak.8829	chr8	77512860	77513260	Arhgap10	1	1	0	0	3	1
peak.8830	chr8	77522081	77522481	Arhgap10	1	0	1	0	3	1
peak.8868	chr8	84945181	84945581	Rtbdn	0	0	1	0	1	1
peak.8869	chr8	84946714	84947114	Rtbdn	1	0	0	0	1	1
peak.8921	chr8	95184226	95184626	Cngb1	1	1	0	0	3	3
peak.8922	chr8	95215947	95216347	Cngb1	1	1	0	1	3	3
peak.8923	chr8	95306418	95306818	Cngb1	1	0	1	0	3	3
peak.8924	chr8	95310562	95310962	Cngb1	1	0	0	0	3	3
peak.8927	chr8	95499254	95499654	Ccdc113	1	0	0	0	3	2
peak.8928	chr8	95533806	95534206	Ccdc113	1	1	0	1	3	2
peak.8973	chr8	109882139	109882539	Marveld3	1	1	0	1	3	3
peak.8974	chr8	109923827	109924227	Marveld3	1	0	1	1	3	3
peak.8975	chr8	109945437	109945837	Marveld3	1	1	0	1	3	3
peak.8976	chr8	109958104	109958504	Marveld3	1	0	0	0	3	3
peak.9029	chr8	119857347	119857747	Klhl36	0	0	1	0	2	3
peak.9030	chr8	119870510	119870910	Klhl36	0	1	0	1	2	3
peak.9049	chr8	120602764	120603164	1190005I06Rik	1	0	0	0	3	0
peak.9050	chr8	120616819	120617219	1190005I06Rik	1	0	0	0	3	0
peak.9051	chr8	120622104	120622504	1190005I06Rik	1	0	0	0	3	0
peak.9052	chr8	120623716	120624116	1190005I06Rik	0	1	0	0	3	0
peak.9053	chr8	120647471	120647871	1190005I06Rik	1	1	0	0	3	0
peak.9063	chr8	123062699	123063099	Spg7	1	1	1	0	3	1
peak.9117	chr9	20740481	20740881	Col5a3	0	0	0	0	1	0
peak.9118	chr9	20790436	20790836	Col5a3	1	0	0	0	1	0
peak.9119	chr9	20818203	20818603	Col5a3	1	0	0	0	1	0
peak.9189	chr9	37207926	37208326	Tmem218	1	1	1	1	3	3
peak.9211	chr9	43384373	43384773	Nectin1	1	0	0	0	3	1
peak.9212	chr9	43607498	43607898	Nectin1	1	1	1	0	3	1
peak.9213	chr9	43734451	43734851	Nectin1	1	0	0	0	3	1
peak.9214	chr9	43749126	43749526	Nectin1	0	0	0	0	3	1
peak.9215	chr9	43758144	43758544	Nectin1	1	0	0	0	3	1
peak.9415	chr9	64951499	64951899	Slc24a1	1	1	0	0	3	0
peak.9461	chr9	72409801	72410201	Mns1	1	1	0	1	3	3
peak.9462	chr9	72426768	72427168	Mns1	1	0	0	0	3	3
peak.9463	chr9	72427855	72428255	Mns1	0	0	1	1	3	3
peak.9464	chr9	72438230	72438630	Mns1	1	0	1	0	3	3
peak.9479	chr9	75242439	75242839	Gnb5	1	1	0	0	3	1
peak.9480	chr9	75287854	75288254	Gnb5	1	0	1	0	3	1
peak.9481	chr9	75306086	75306486	Gnb5	1	0	0	0	3	1
peak.9603	chr9	107340521	107340921	6430571L13Rik	1	0	0	0	1	1
peak.9604	chr9	107347504	107347904	6430571L13Rik	1	0	1	0	1	1
peak.9605	chr9	107382496	107382896	6430571L13Rik	1	0	0	0	1	1
peak.9609	chr9	107668012	107668412	Gnat1	1	0	0	0	3	3
peak.9610	chr9	107670275	107670675	Gnat1	1	1	0	0	3	3
peak.9611	chr9	107675618	107676018	Gnat1	1	0	0	0	3	3
peak.9612	chr9	107678274	107678674	Gnat1	1	1	0	1	3	3
peak.9613	chr9	107679531	107679931	Gnat1	1	0	1	0	3	3
peak.9647	chr9	110458027	110458427	Klhl18	1	0	0	0	3	3
peak.9648	chr9	110462310	110462710	Klhl18	1	1	0	1	3	3
peak.9649	chr9	110469086	110469486	Klhl18	0	1	1	1	3	3
peak.9783	chrX	100605268	100605668	Arr3	1	1	1	0	3	1
peak.9806	chrX	142196820	142197220	Gucy2f	1	0	0	0	1	0
